# Supplementary material for: Exploration of Novel Scaffolds Targeting Cytochrome b of Pyricularia oryzae
Source: MDPI journal article supplement (doi:10.3390/ijms24032705), 2023-01-31

## Supporting information

### Exploration of novel scaffolds targeting cytochrome *b* of *Pyricularia oryzae*

Cecilia Pinna<sup>1†</sup>, Tommaso Laurenzi<sup>2†</sup>, Fabio Forlani<sup>1</sup>, Luca Palazzolo<sup>2</sup>, Claire Beatrice Nolan<sup>1</sup>, Michael S. Christodoulou<sup>1</sup>, Paolo Cortesi<sup>1</sup>, Andrea Pinto<sup>1</sup>, Ivano Eberini<sup>2,3\*</sup>, Andrea Kunova<sup>1\*</sup>, and Sabrina Dallavalle<sup>1</sup>

**Supplementary Table S1.** Compounds selected after high-throughput virtual screening (HTVS) and interaction fingerprint clustering (SIFT)

| Title                                                                                                          | XPGscore<br>[Kcal/mol] | mw     | XPGscore/m<br>w | Interactions                                                                                 |
|----------------------------------------------------------------------------------------------------------------|------------------------|--------|-----------------|----------------------------------------------------------------------------------------------|
| 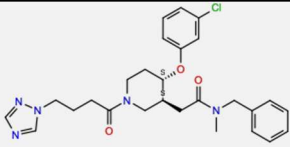<br><b>BioDesign:122364</b>   | -12.91                 | 510.03 | -0.025          | -Glu273 H-bond                                                                               |
| <br><b>BioDesign:88775</b>    | -11.73                 | 448.52 | -0.026          | -Glu273 H-bond<br>-Met296 H-bond                                                             |
| <br><b>Agrochem:9387</b>      | -11.10                 | 372.22 | -0.029          | -Glu273 H-bond<br>-Tyr280 $\pi-\pi$ stacking                                                 |
| <br><b>Agrochem:6989_mod</b> | -10.08                 | 329.79 | -0.031          | -Glu273 H-bond<br>-Tyr280 $\pi-\pi$ stacking                                                 |
| <br><b>Biodesign:7778</b>   | -11.44                 | 427.5  | -0.027          | -Glu273 H-bond<br>-Tyr275 H-bond<br>-Tyr280 $\pi-\pi$ stacking                               |
| <br><b>Biodesign:7763</b>   | -10.90                 | 398.44 | -0.027          | -Glu273 H-bond<br>-Met125 H-bond<br>-Tyr279 $\pi-\pi$ stacking<br>-Tyr280 $\pi-\pi$ stacking |
| <br><b>Biodesign:61594</b>  | -10.80                 | 359.85 | -0.030          | -Tyr275 H-bond                                                                               |

|                                                                                   |        |        |        |                                                     |
|-----------------------------------------------------------------------------------|--------|--------|--------|-----------------------------------------------------|
| 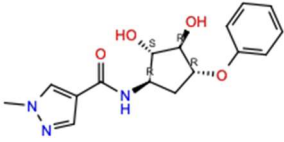 | -10.56 | 317.34 | -0.033 | -Glu273 H-bond<br>-Tyr275 H-bond                    |
| <b>Biodesign:101550</b>                                                           |        |        |        |                                                     |
|  | -10.22 | 190.18 | -0.054 | -Tyr132 $\pi$ - $\pi$<br>stacking<br>-Tyr275 H-bond |
| <b>Biodesign:1678</b>                                                             |        |        |        |                                                     |
|  | -11.35 | 429.53 | -0.026 | -Glu273 H-bond                                      |
| <b>Biodesign:14185</b>                                                            |        |        |        |                                                     |
|  | -10.83 | 393.31 | -0.028 | -Glu273 H-bond<br>-Phe279 $\pi$ - $\pi$<br>stacking |
| <b>Agrochem:6151</b>                                                              |        |        |        |                                                     |

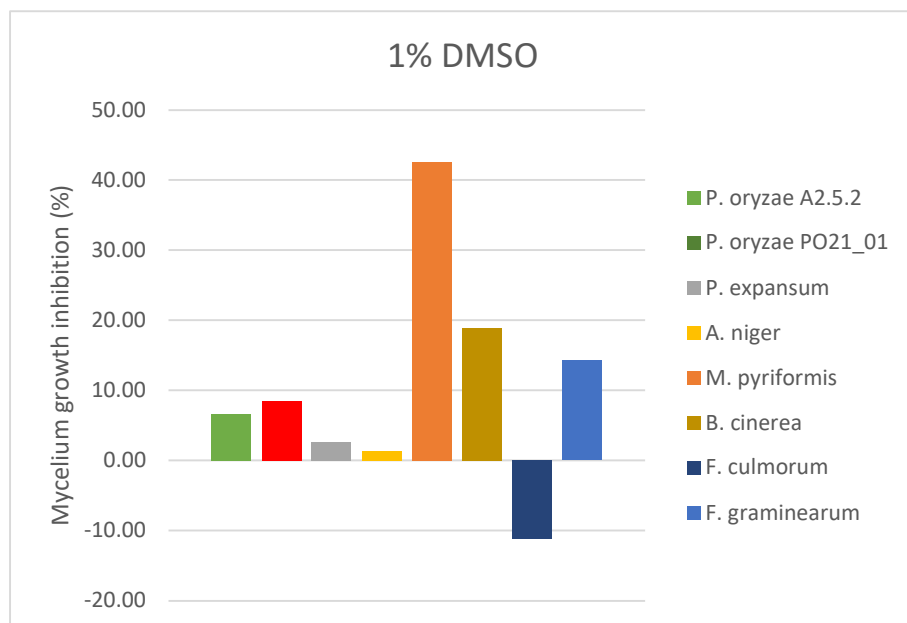

**Supplementary Figure S1.** Inhibition of mycelium growth of diverse fungi by 1% DMSO.



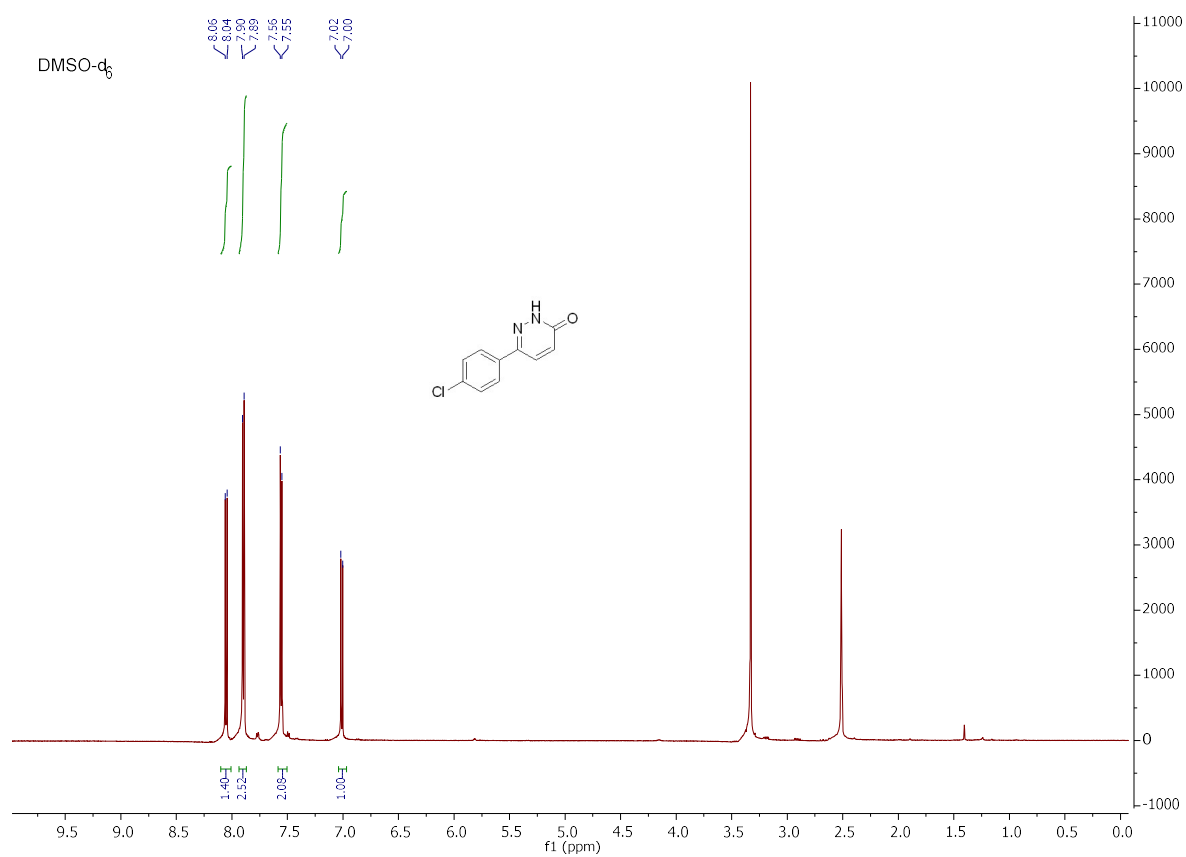

Supplementary Figure S4.  $^1\text{H}$ -NMR 1b.

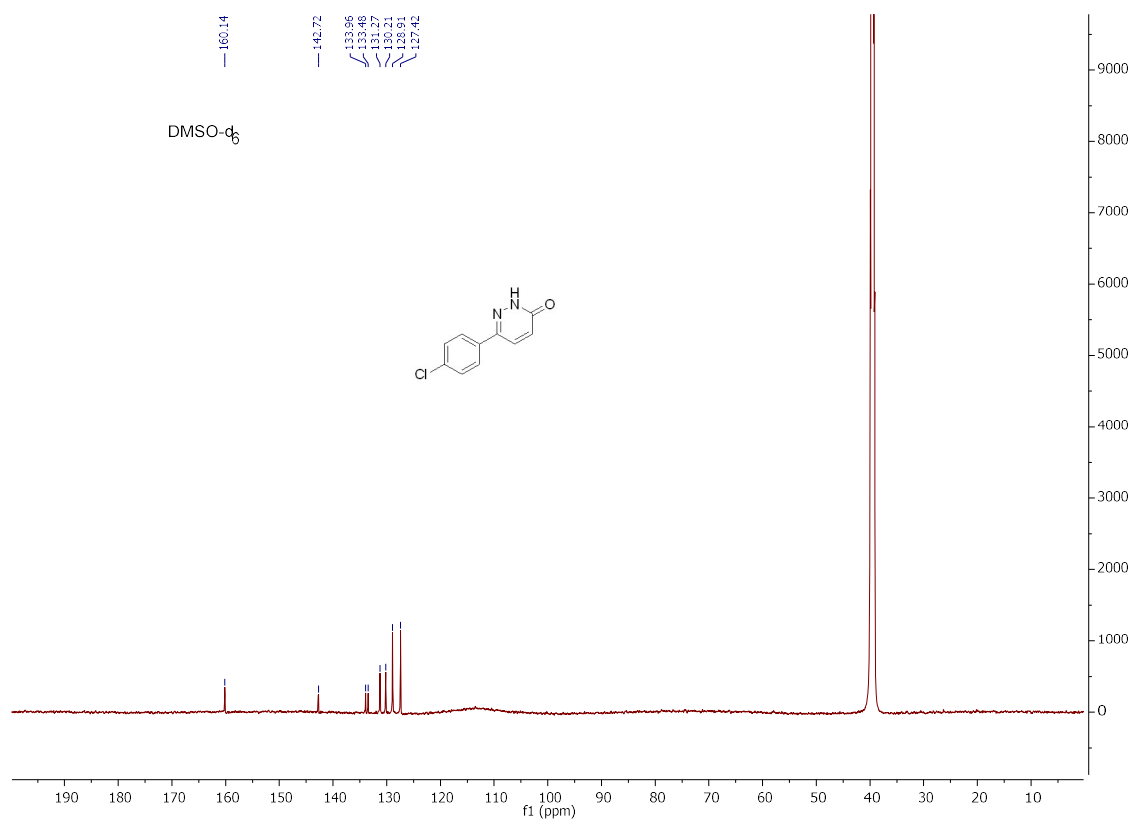

Supplementary Figure S5.  $^{13}\text{C}$ -NMR 1b.

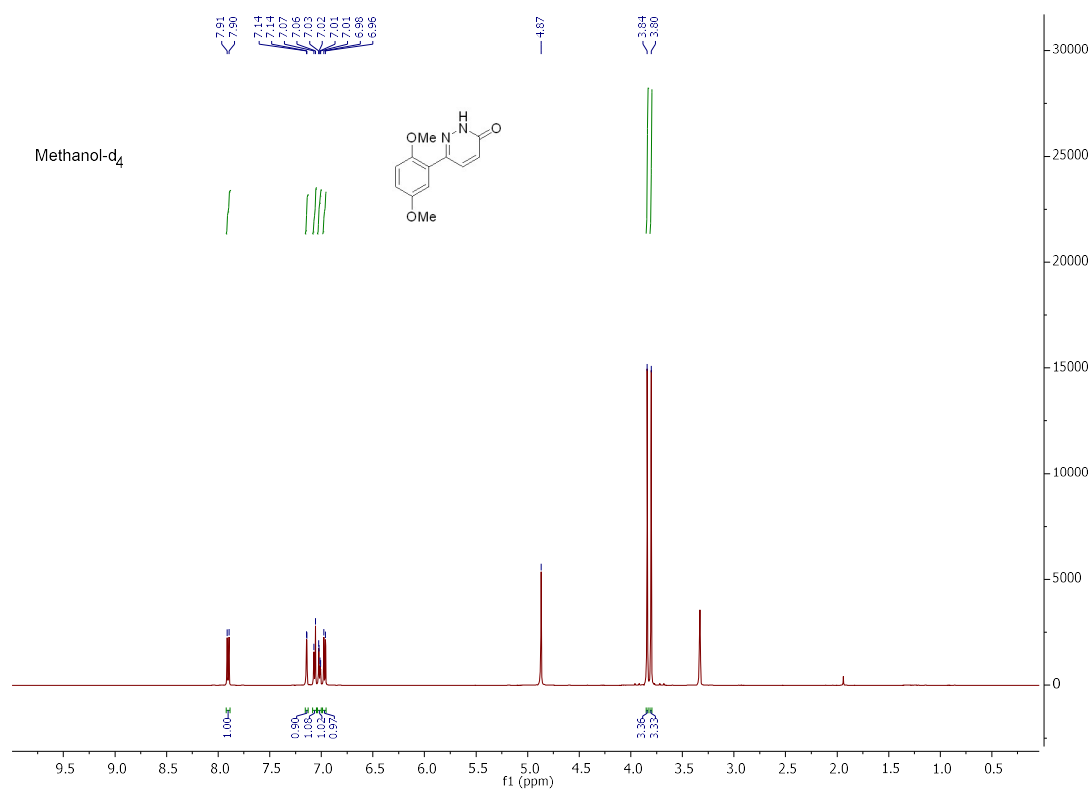

Supplementary Figure S6. <sup>1</sup>H-NMR 1c.

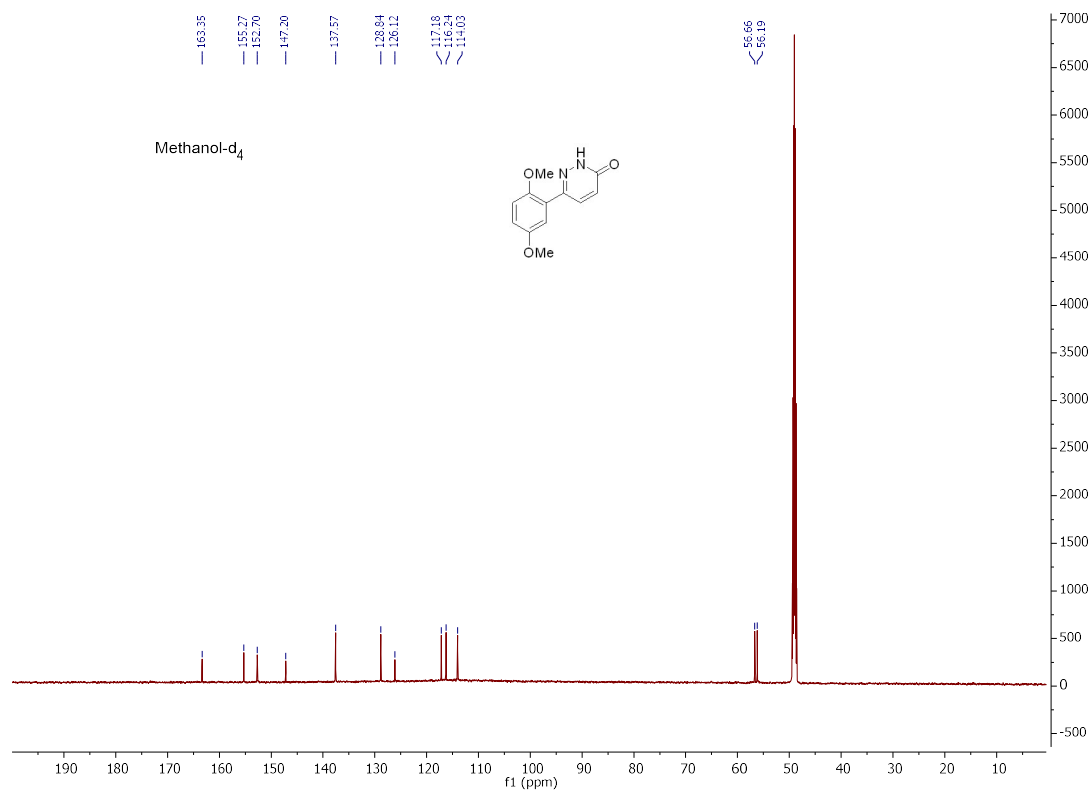

Supplementary Figure S7. <sup>13</sup>C-NMR 1c.

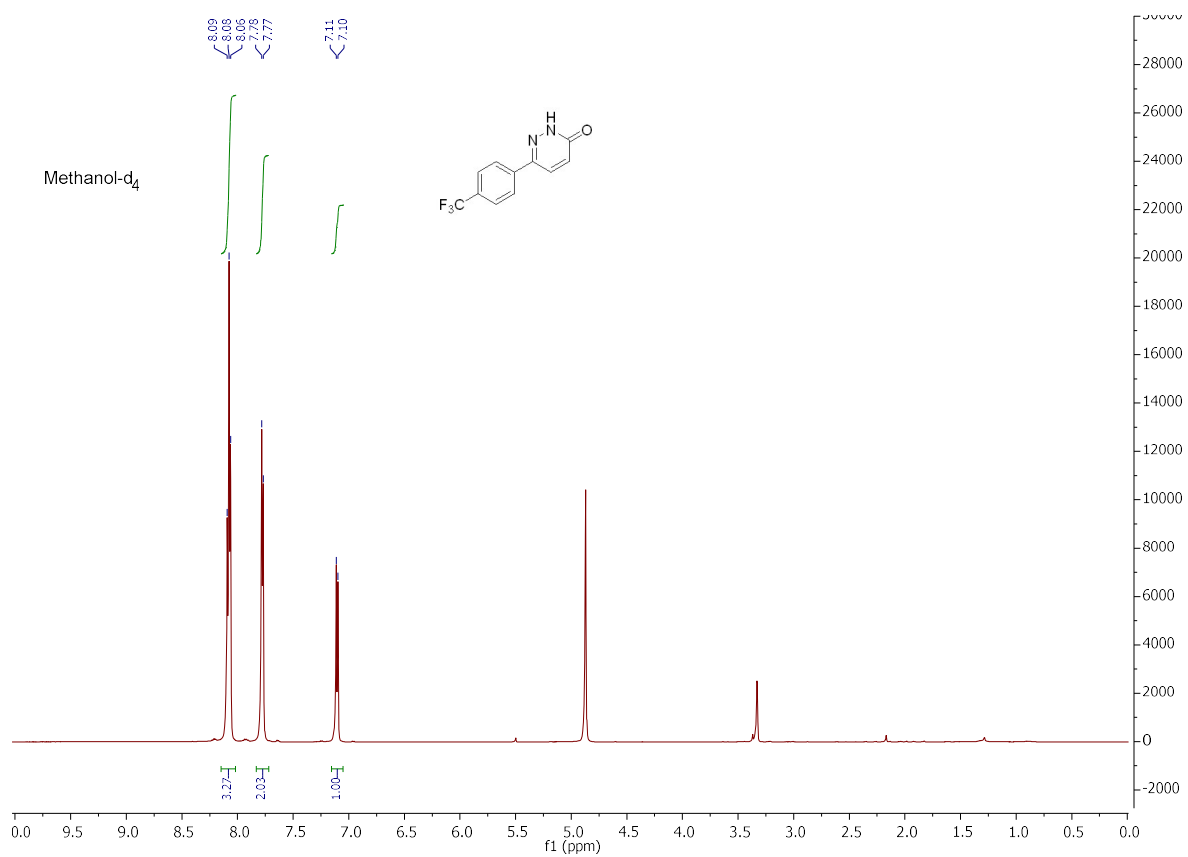

Supplementary Figure S8.  $^1\text{H}$ -NMR 1d.

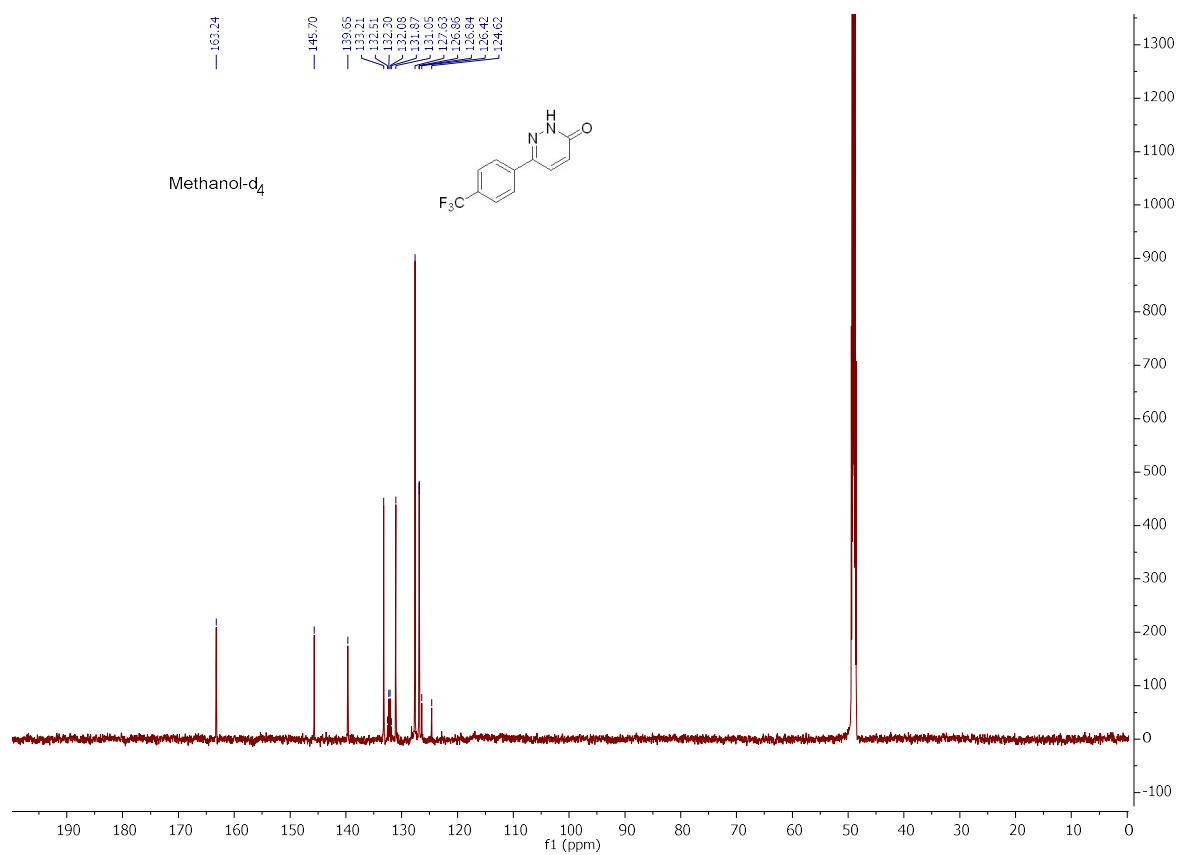

Supplementary Figure S9.  $^{13}\text{C}$ -NMR 1d.





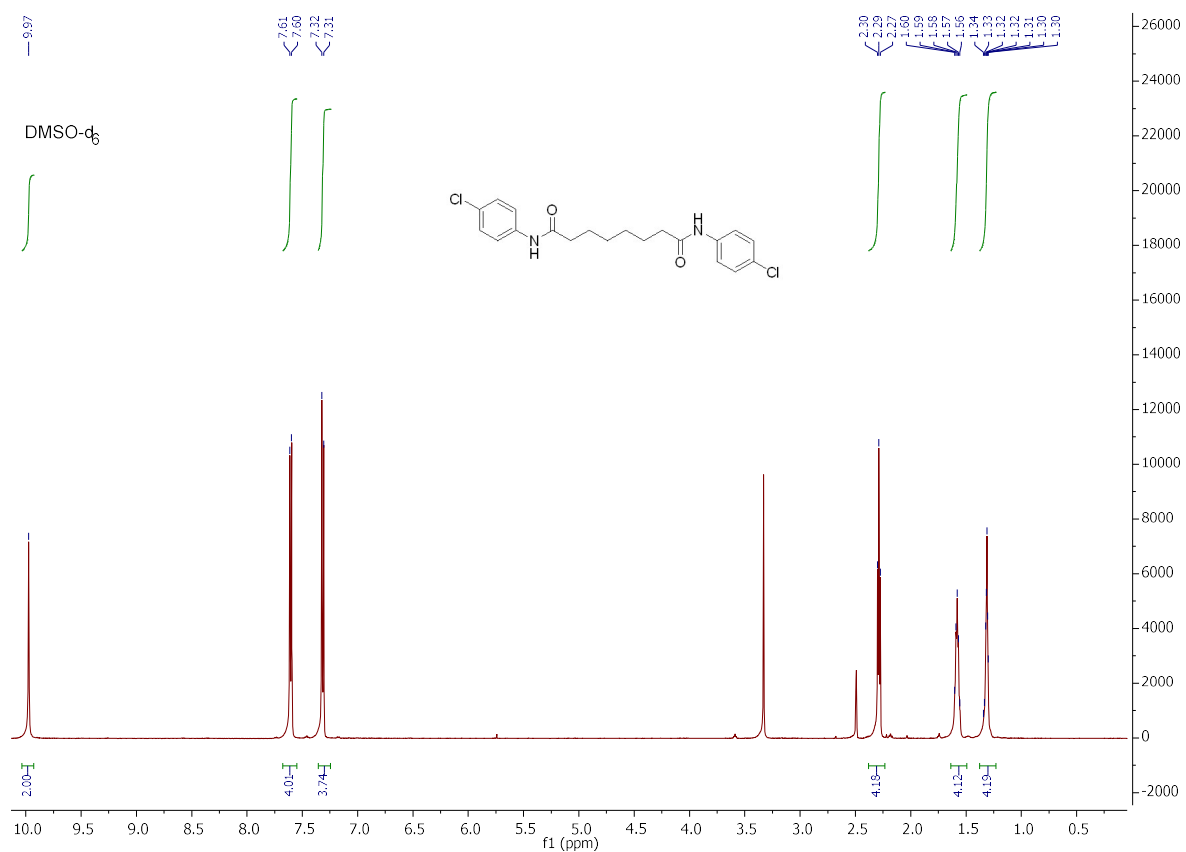

Supplementary Figure S12. <sup>1</sup>H-NMR 2a.

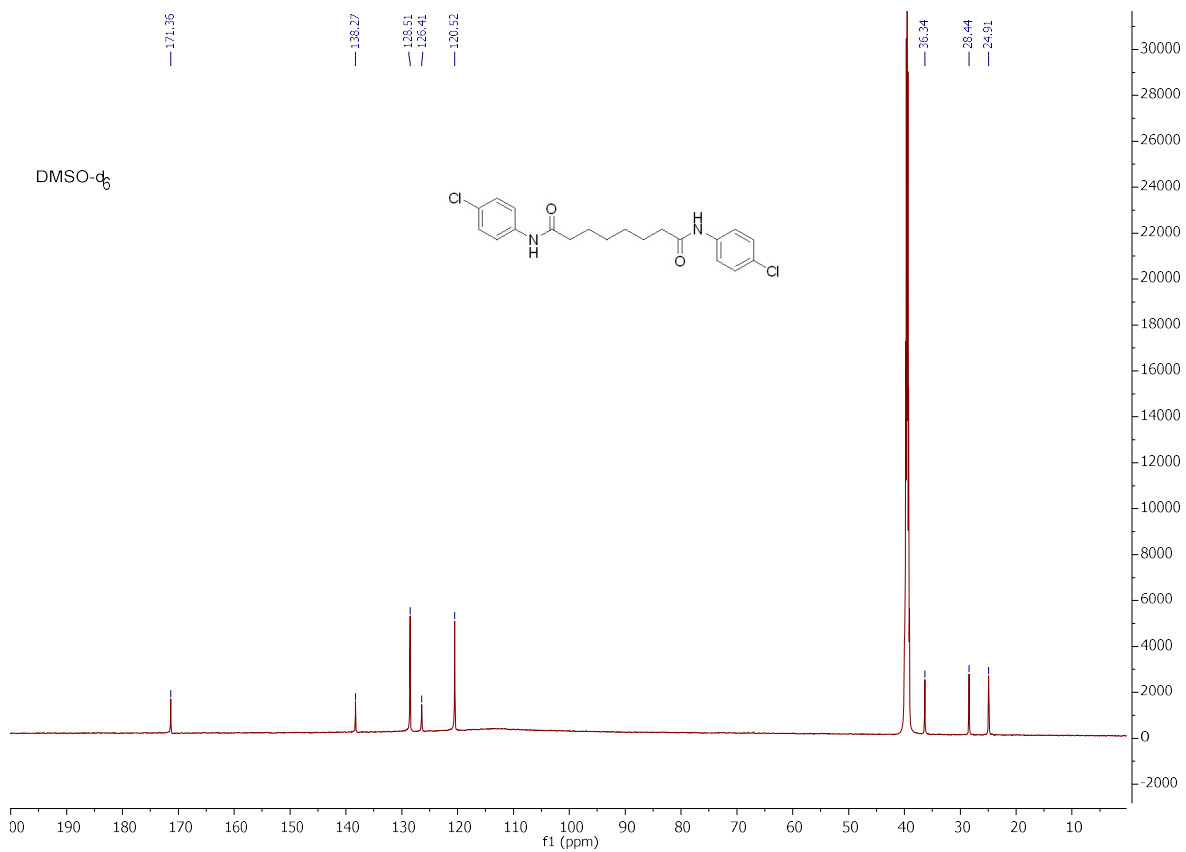

Supplementary Figure S13. <sup>13</sup>C-NMR 2a.

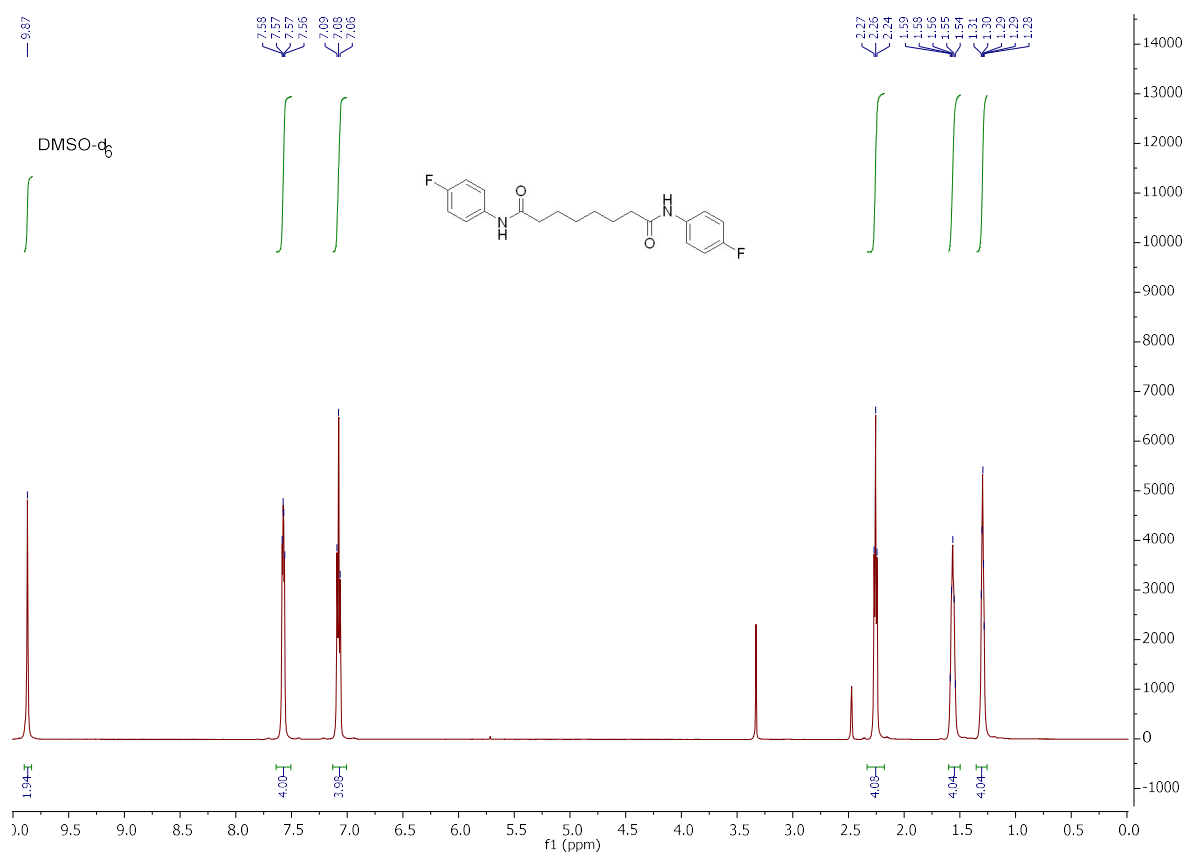

Supplementary Figure S14. <sup>1</sup>H-NMR 2b.

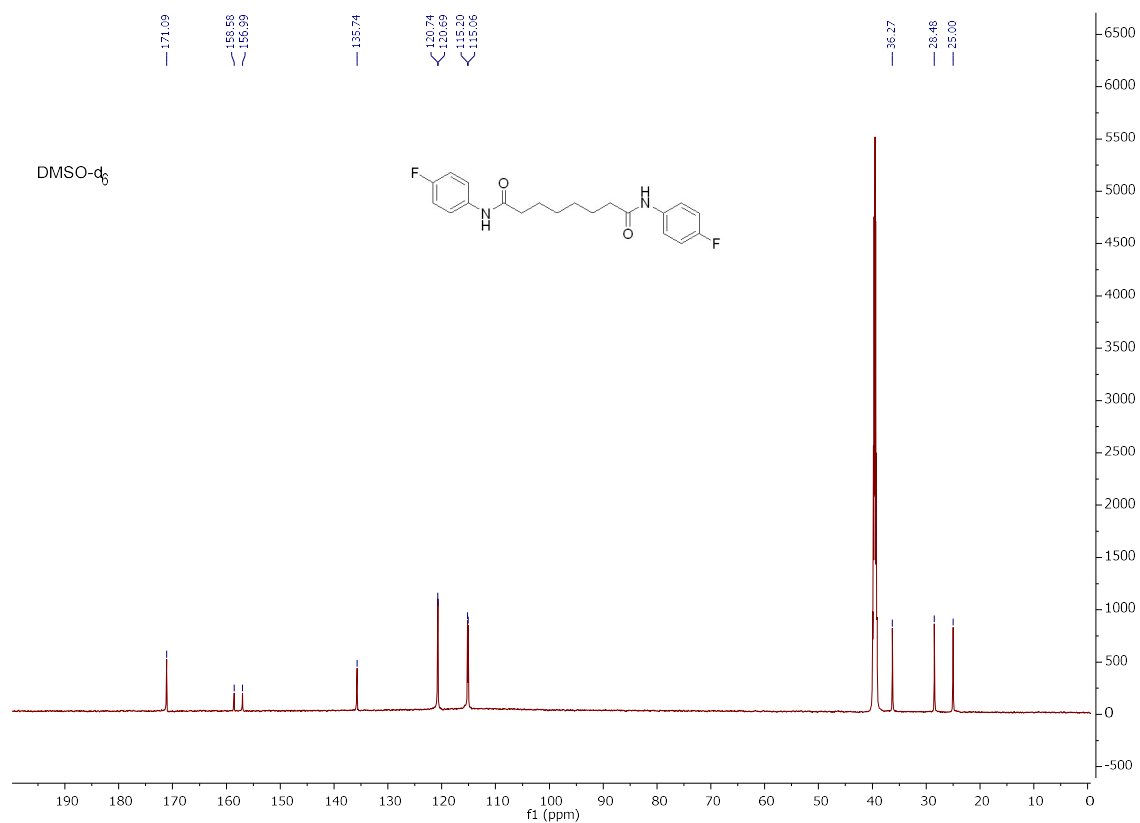

Supplementary Figure S15. <sup>13</sup>C-NMR 2b.

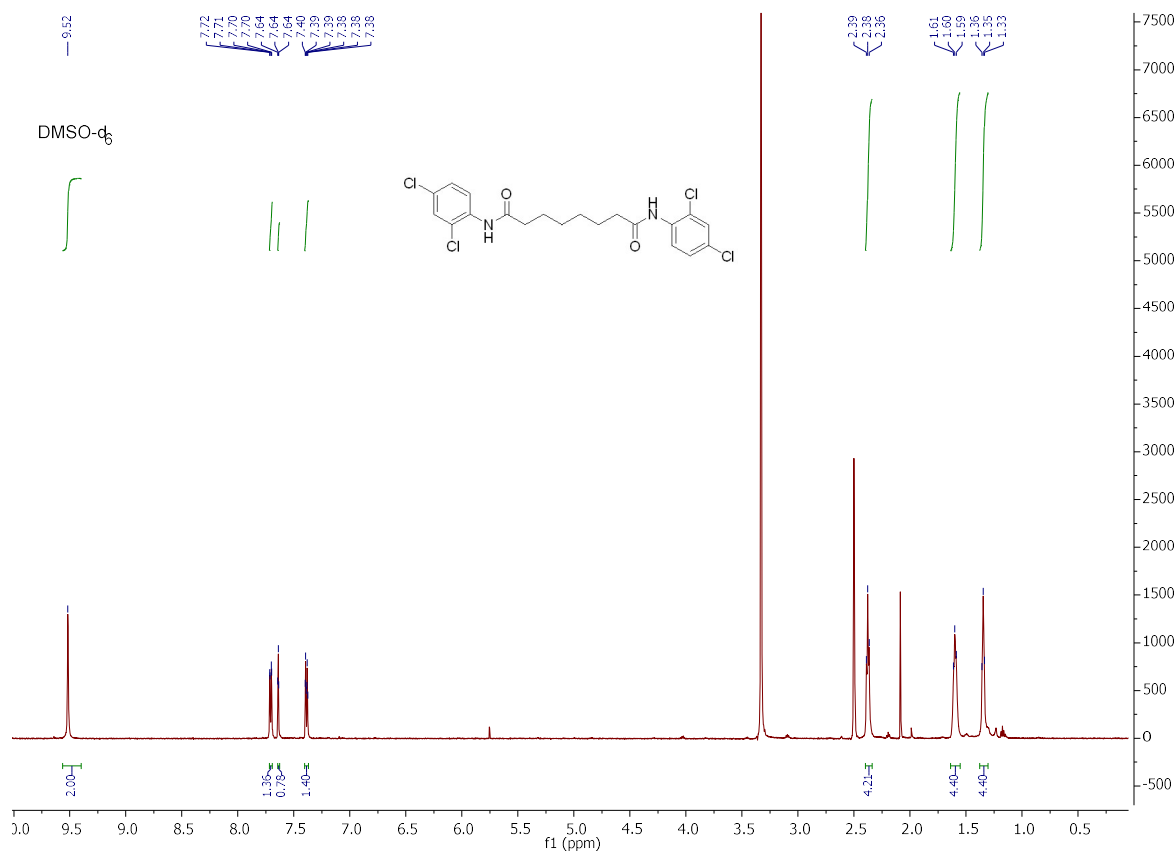

Supplementary Figure S16. <sup>1</sup>H-NMR 2c.

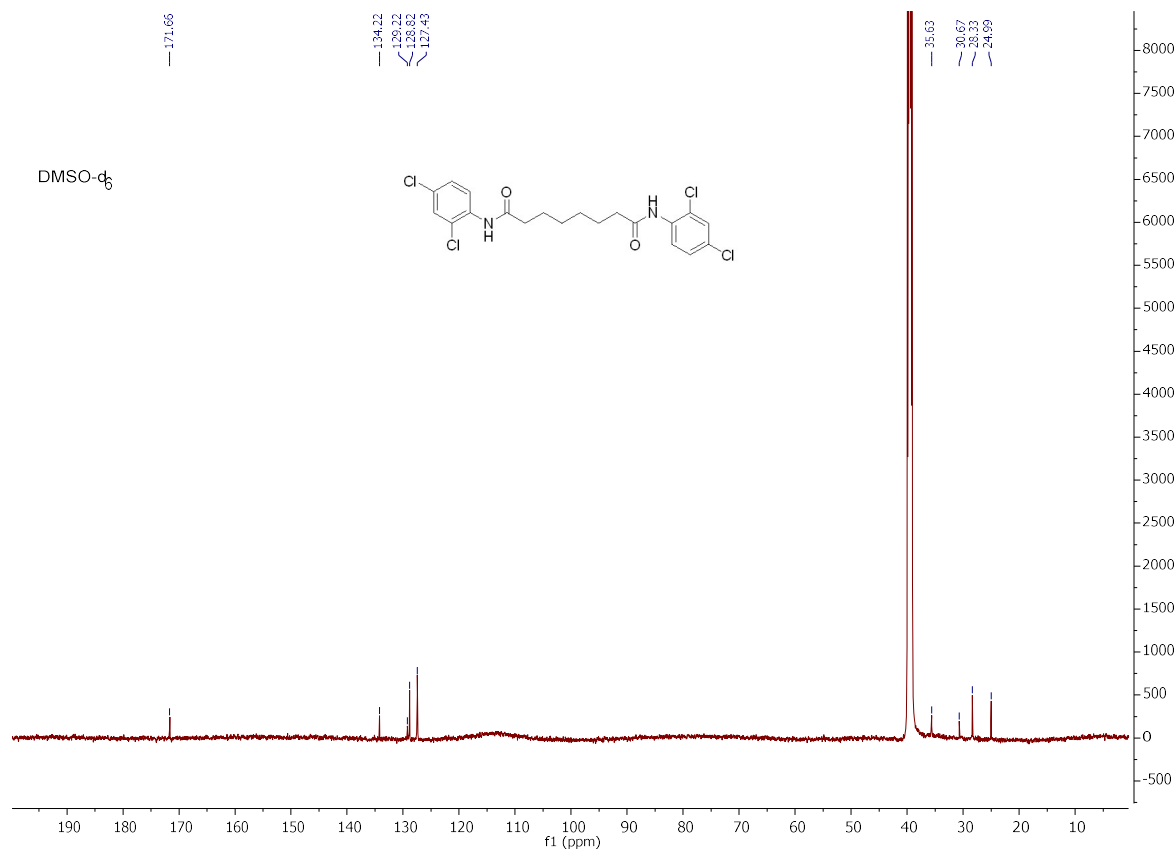

Supplementary Figure S17. <sup>13</sup>C-NMR 2c.

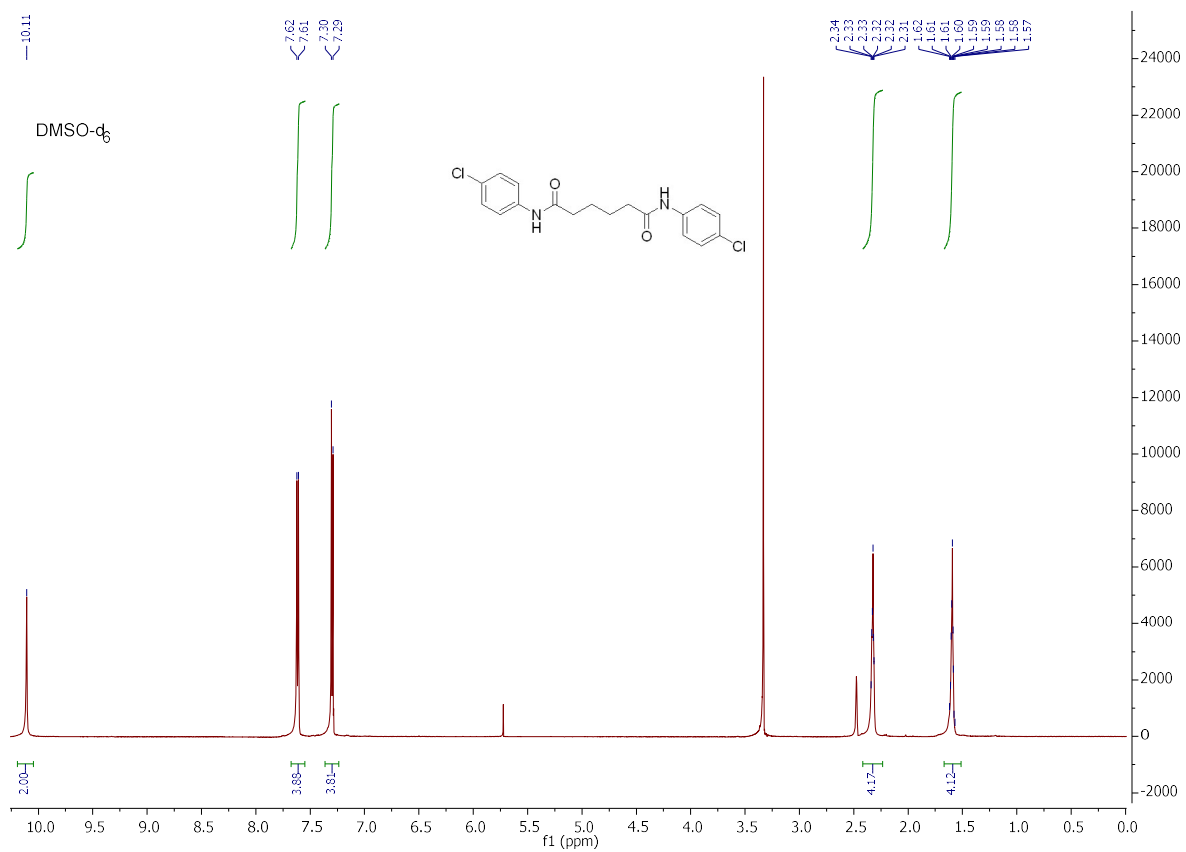

**Supplementary Figure S18. <sup>1</sup>H-NMR 2d.**

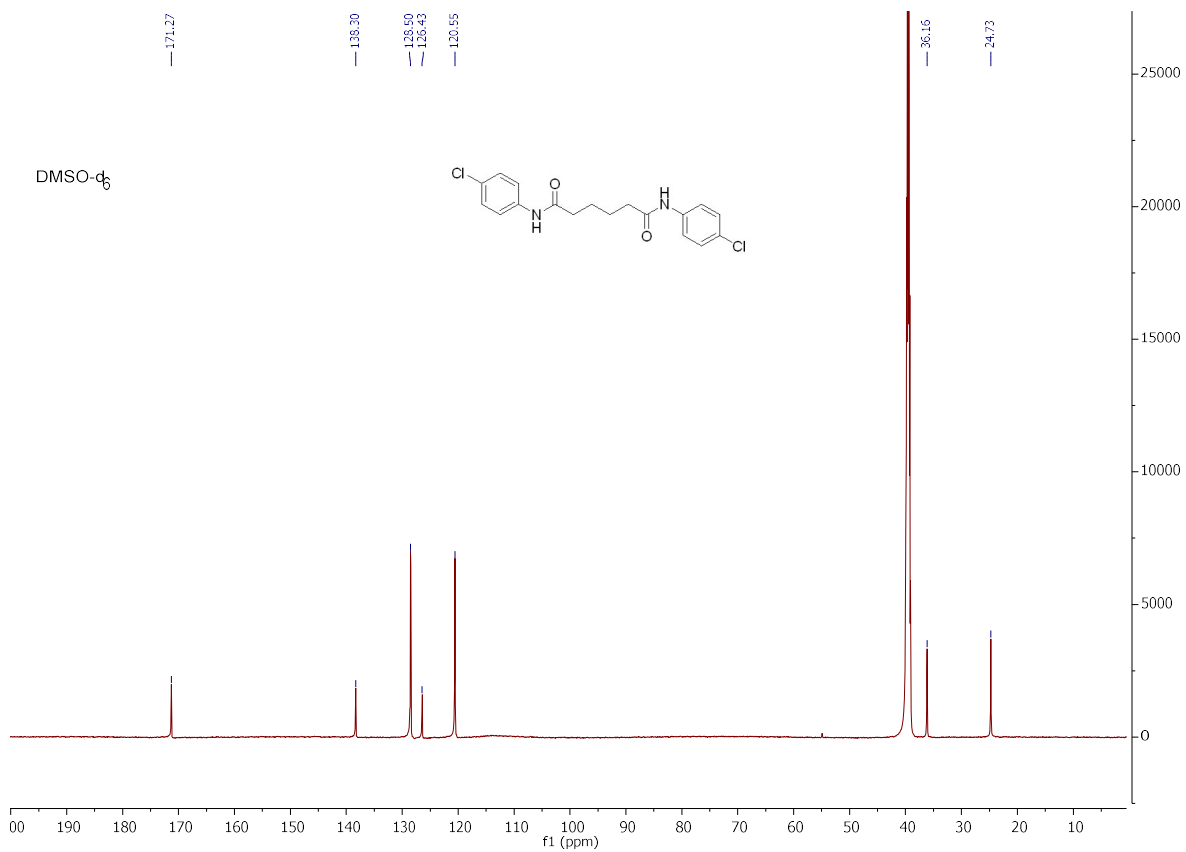

**Supplementary Figure S19. <sup>13</sup>C-NMR 2d.**

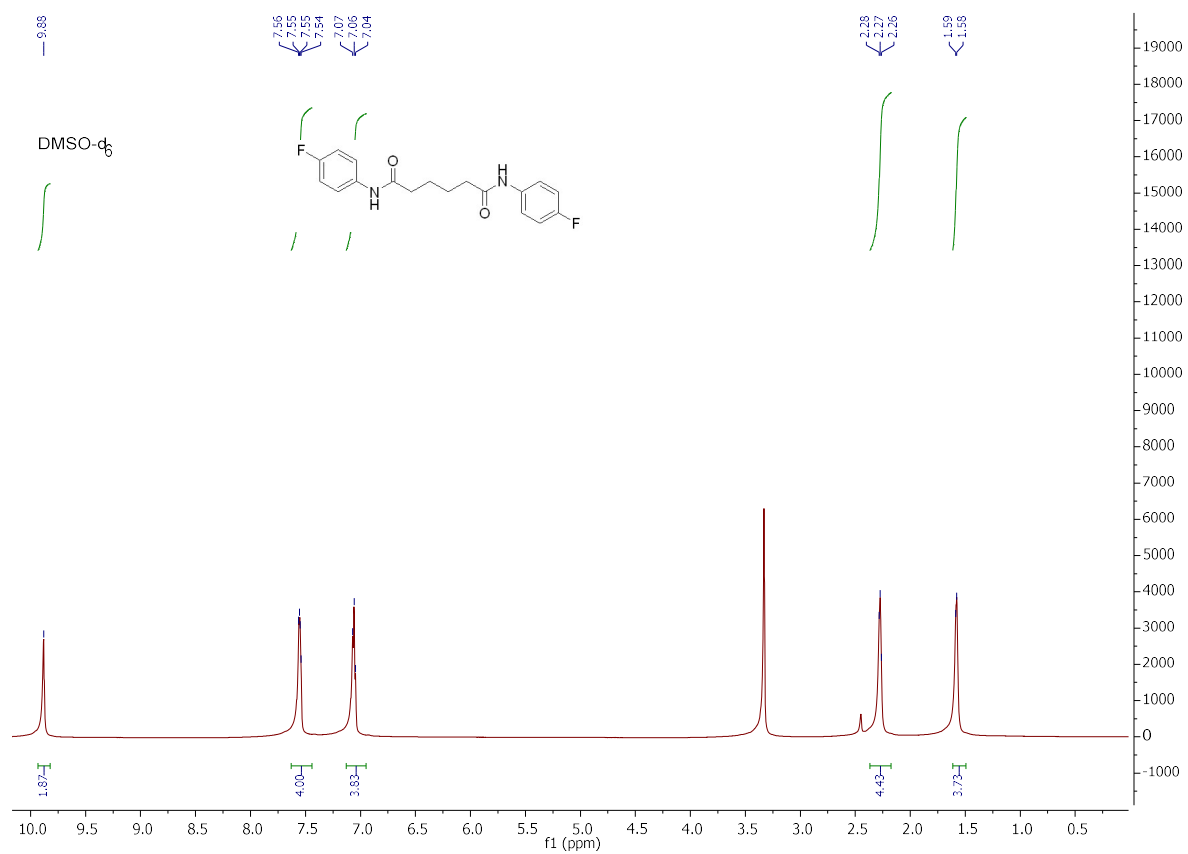

Supplementary Figure S20. <sup>1</sup>H-NMR 2e.

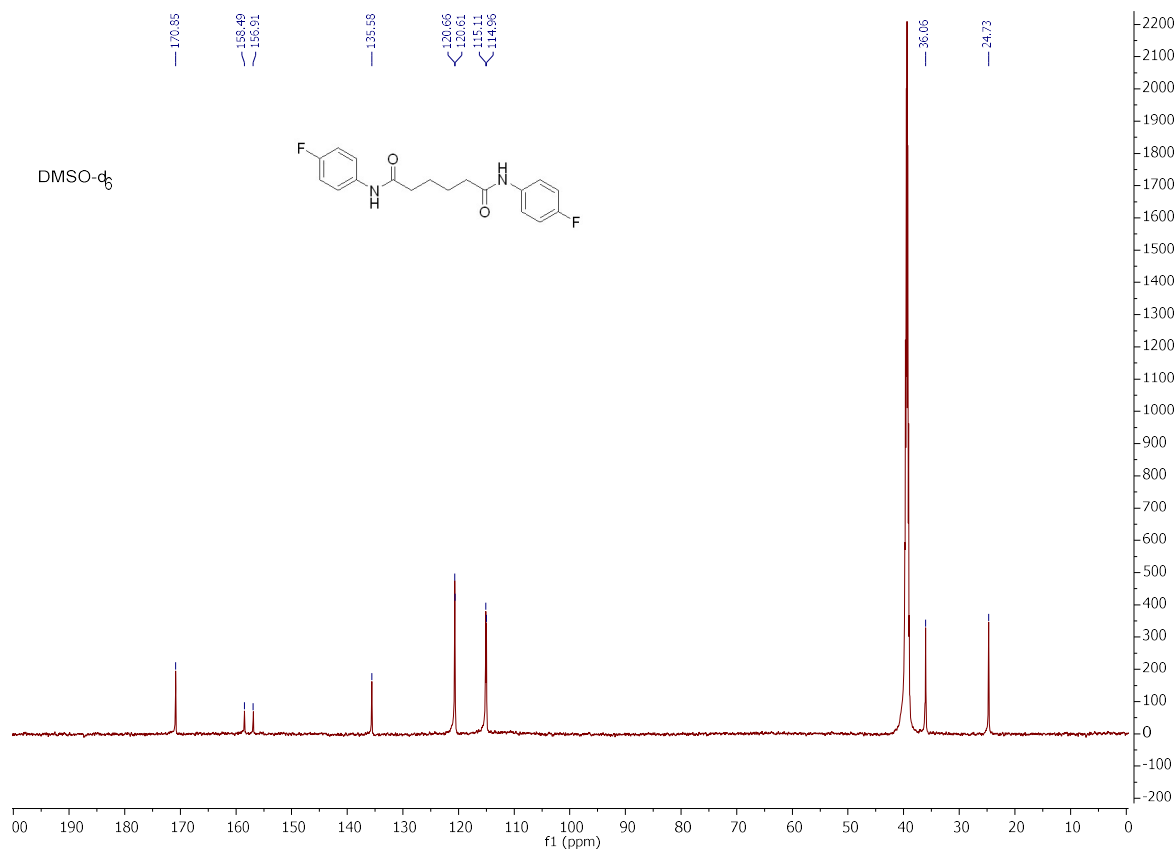

Supplementary Figure S21. <sup>13</sup>C-NMR 2e.

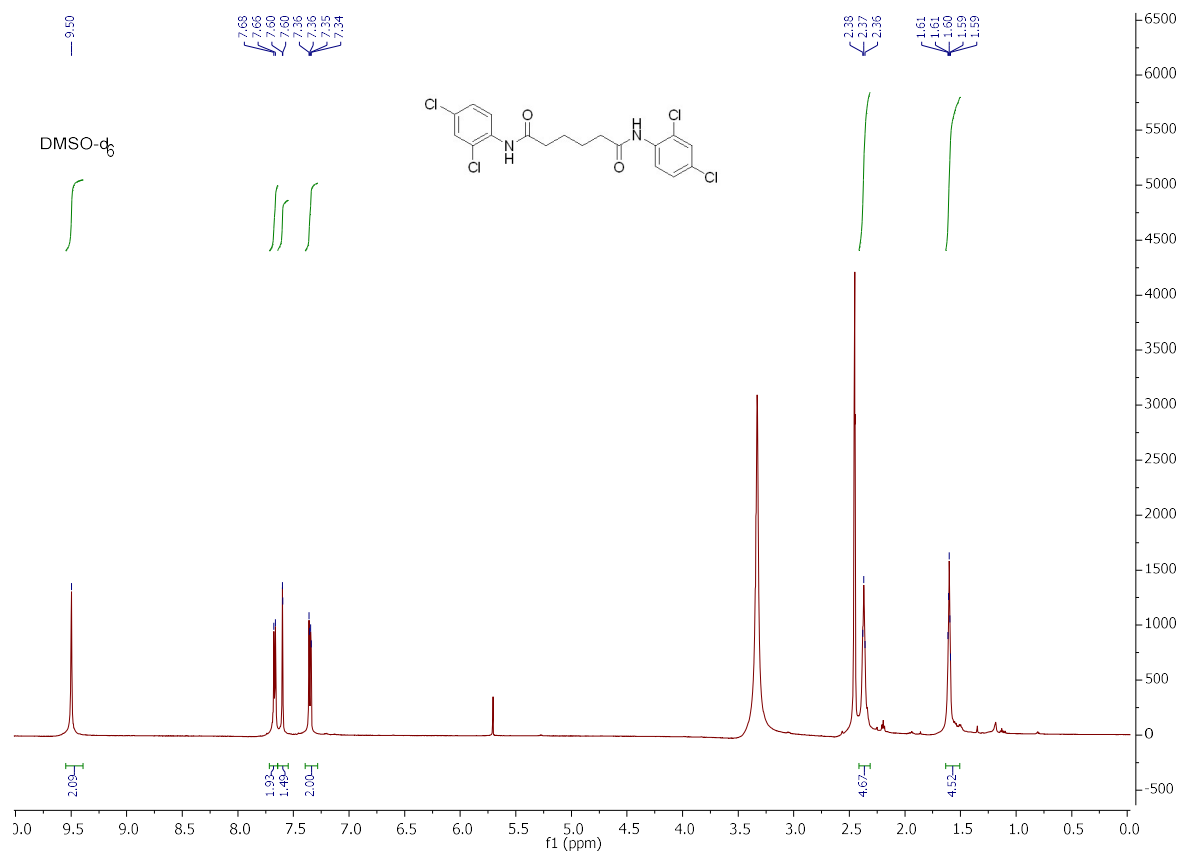

Supplementary Figure S22. <sup>1</sup>H-NMR 2f.

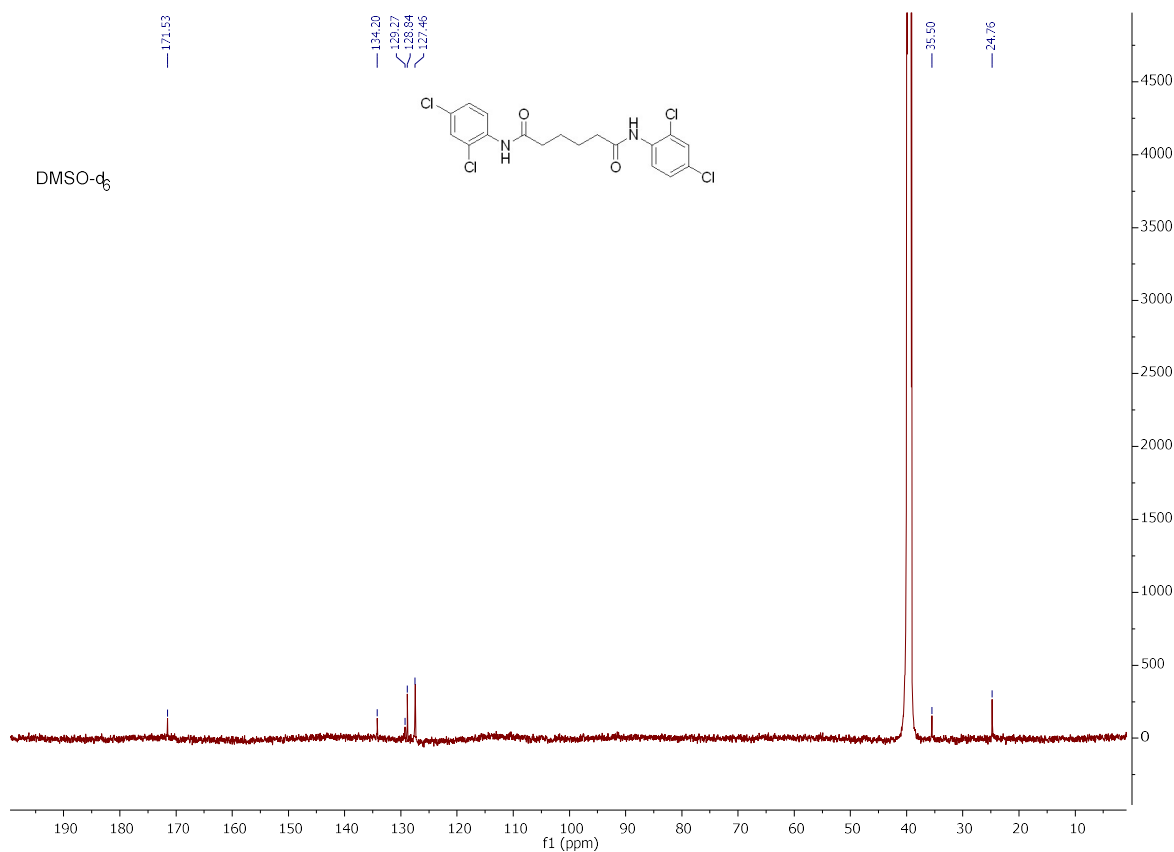

Supplementary Figure S23. <sup>13</sup>C-NMR 2f.

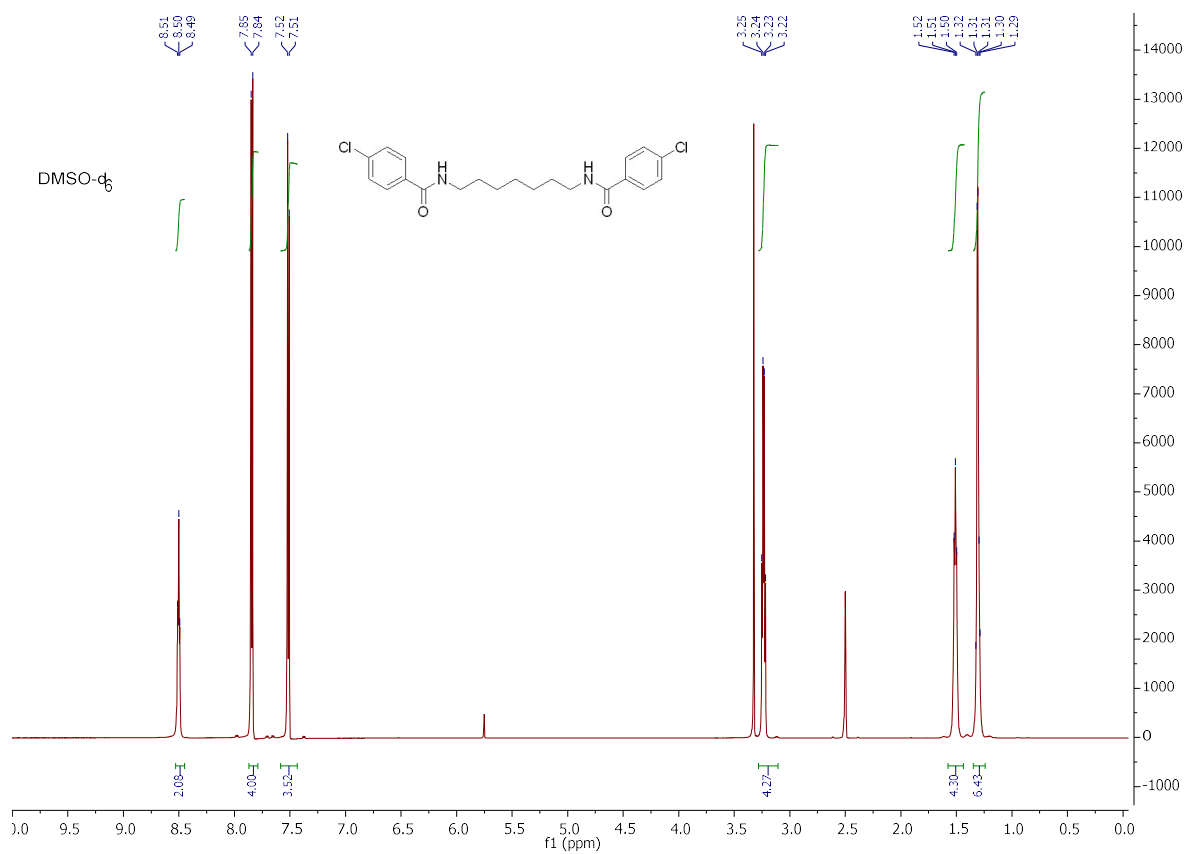

Supplementary Figure S24. <sup>1</sup>H-NMR 5a.

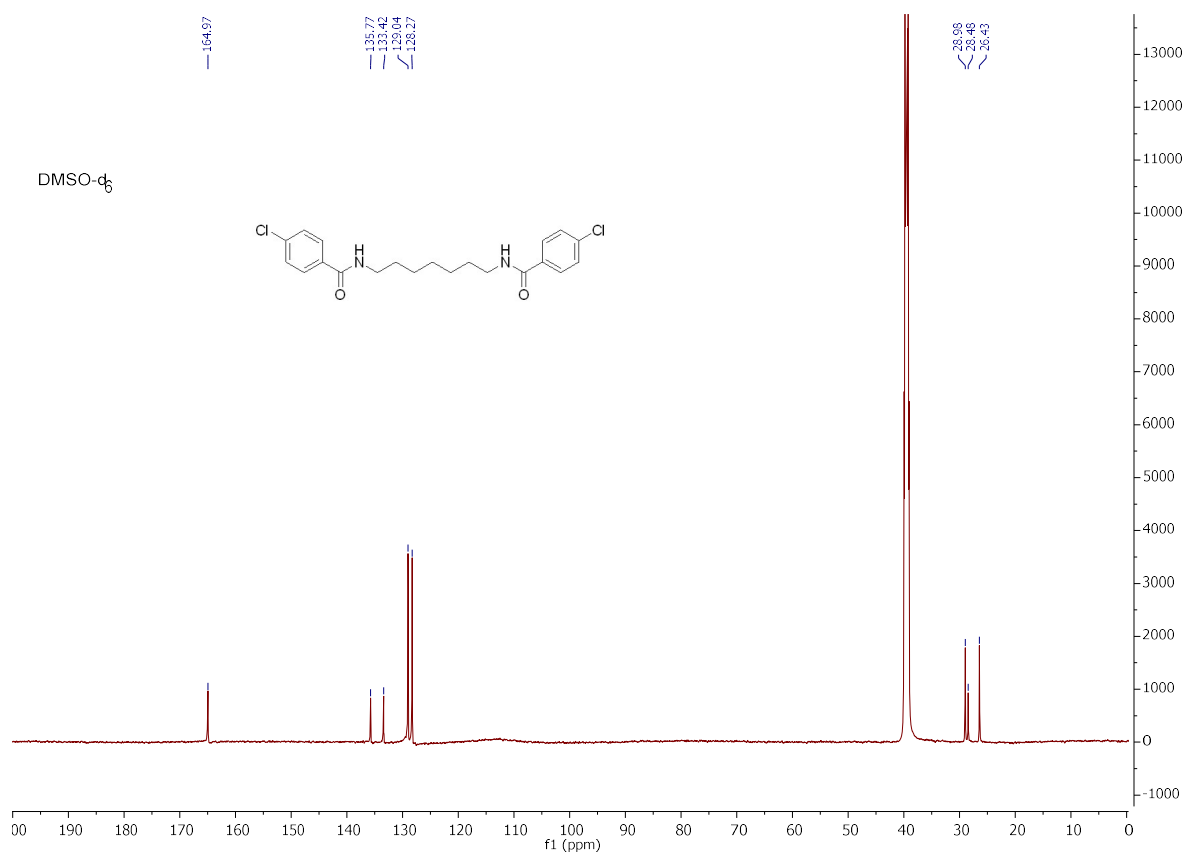

Supplementary Figure S25. <sup>13</sup>C-NMR 5a.



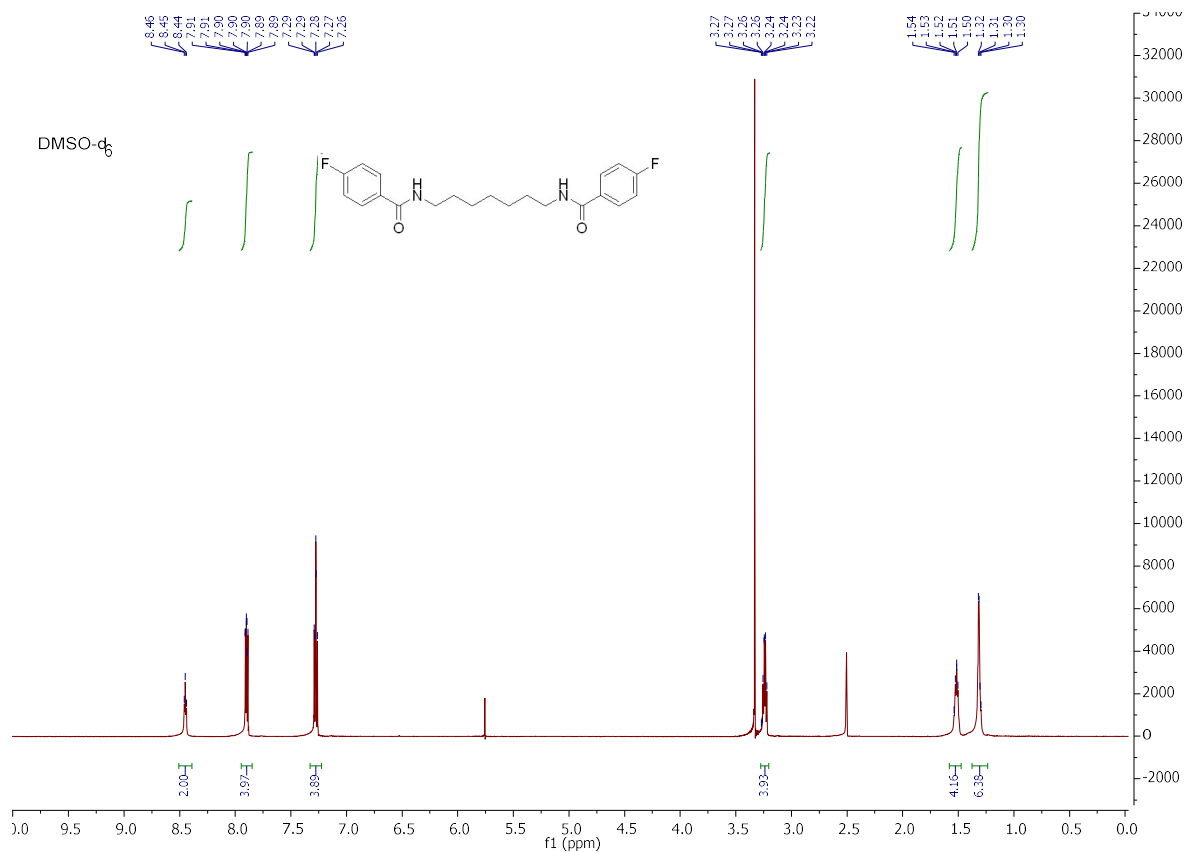

Supplementary Figure S26.  $^1\text{H}$ -NMR 5b.

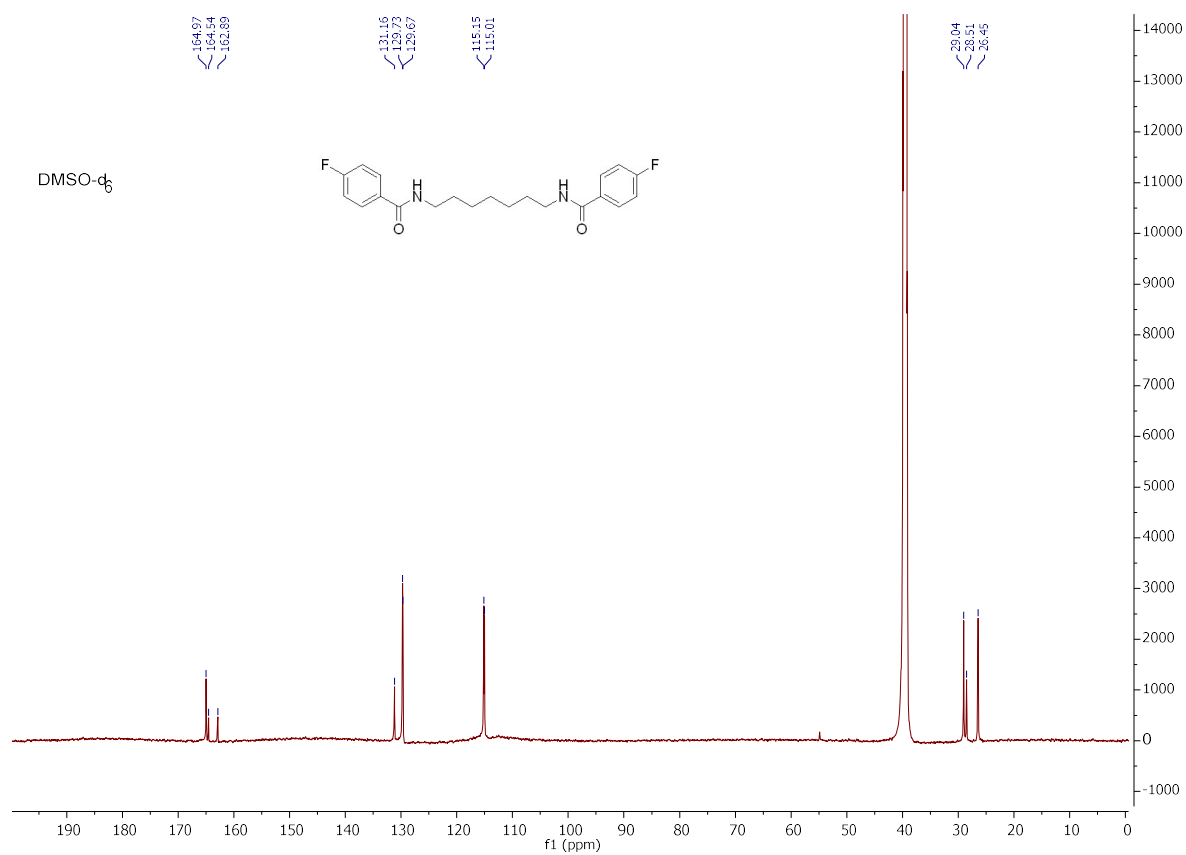

Supplementary Figure S27.  $^{13}\text{C}$ -NMR 5b.

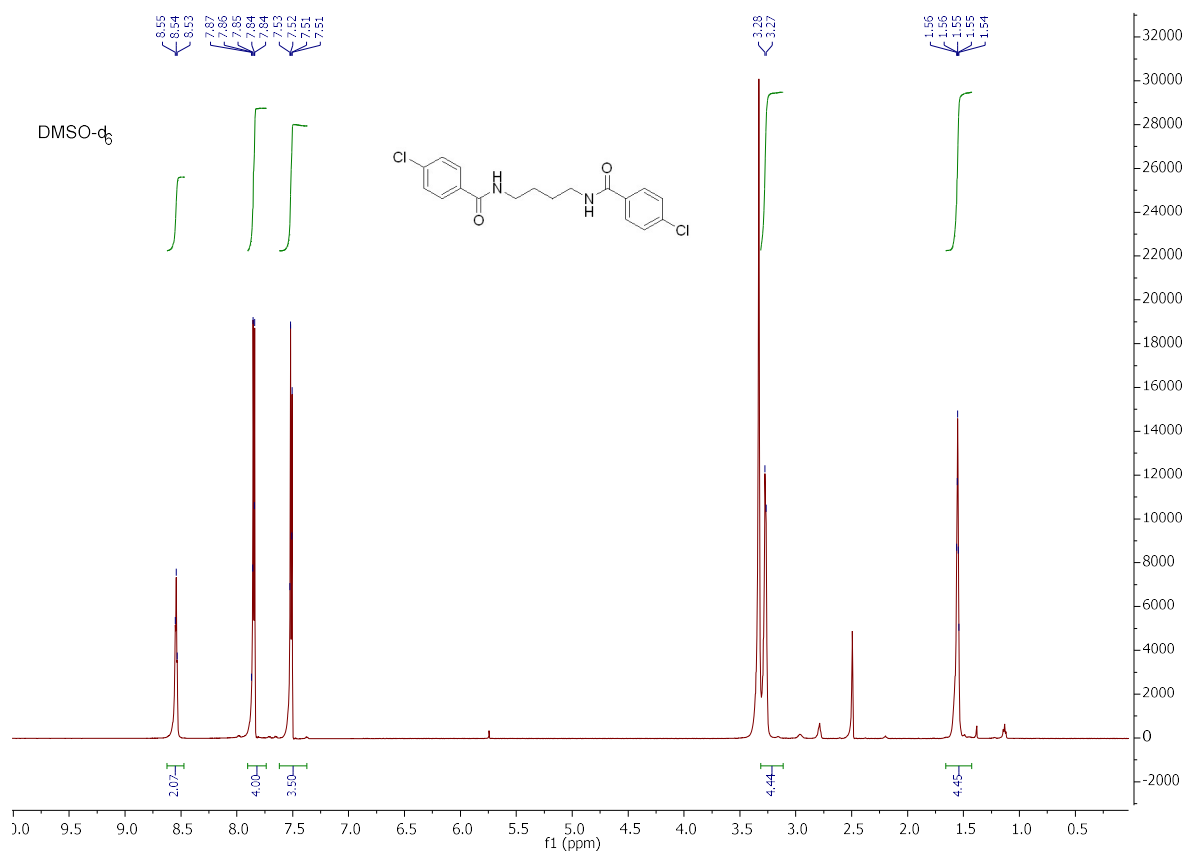

Supplementary Figure S28. <sup>1</sup>H-NMR 5c.

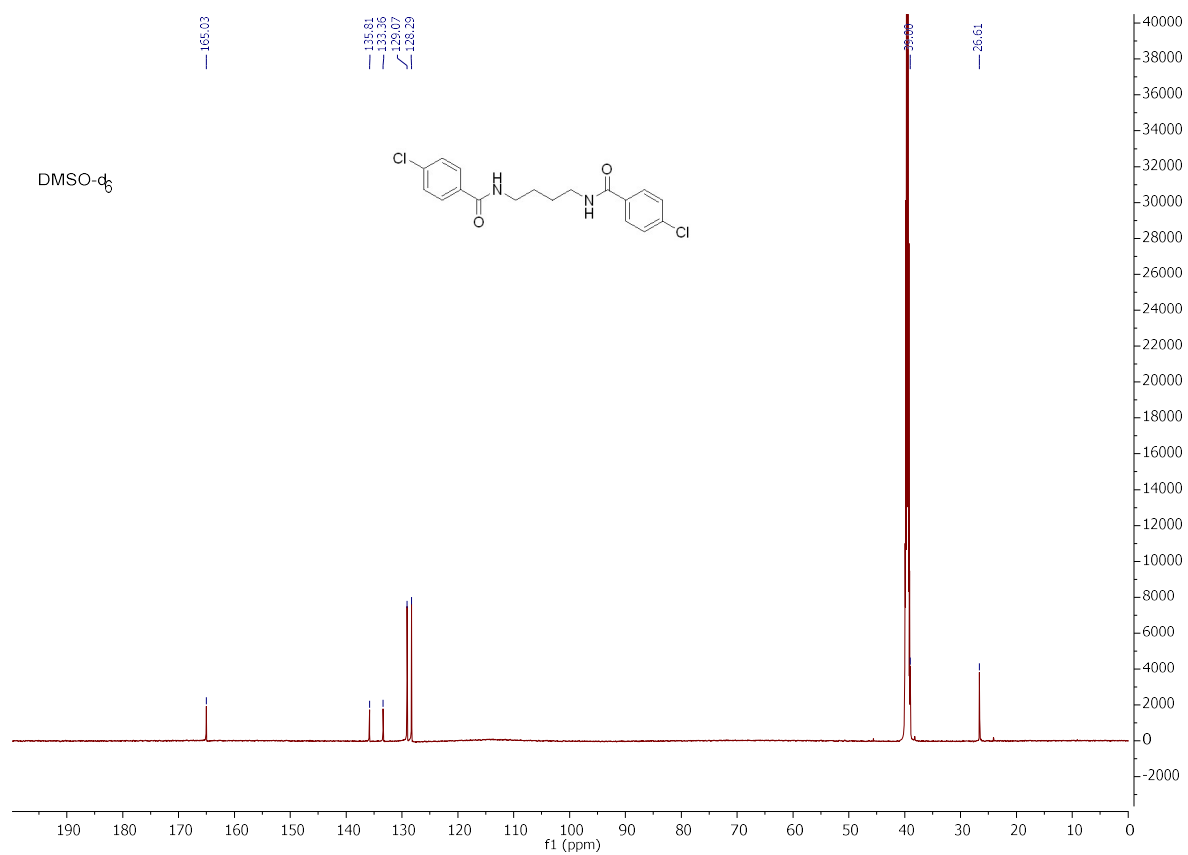

Supplementary Figure S29. <sup>13</sup>C-NMR 5c.

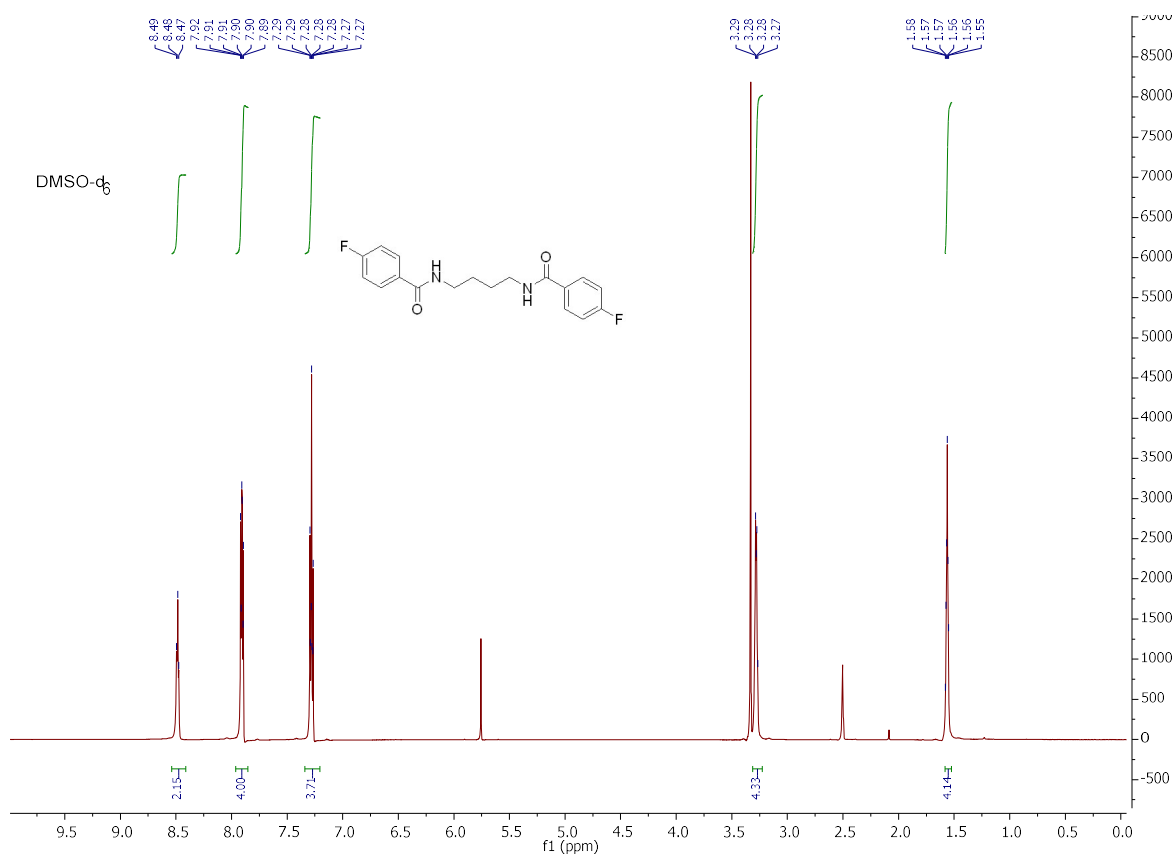

Supplementary Figure S30. <sup>1</sup>H-NMR 5d.

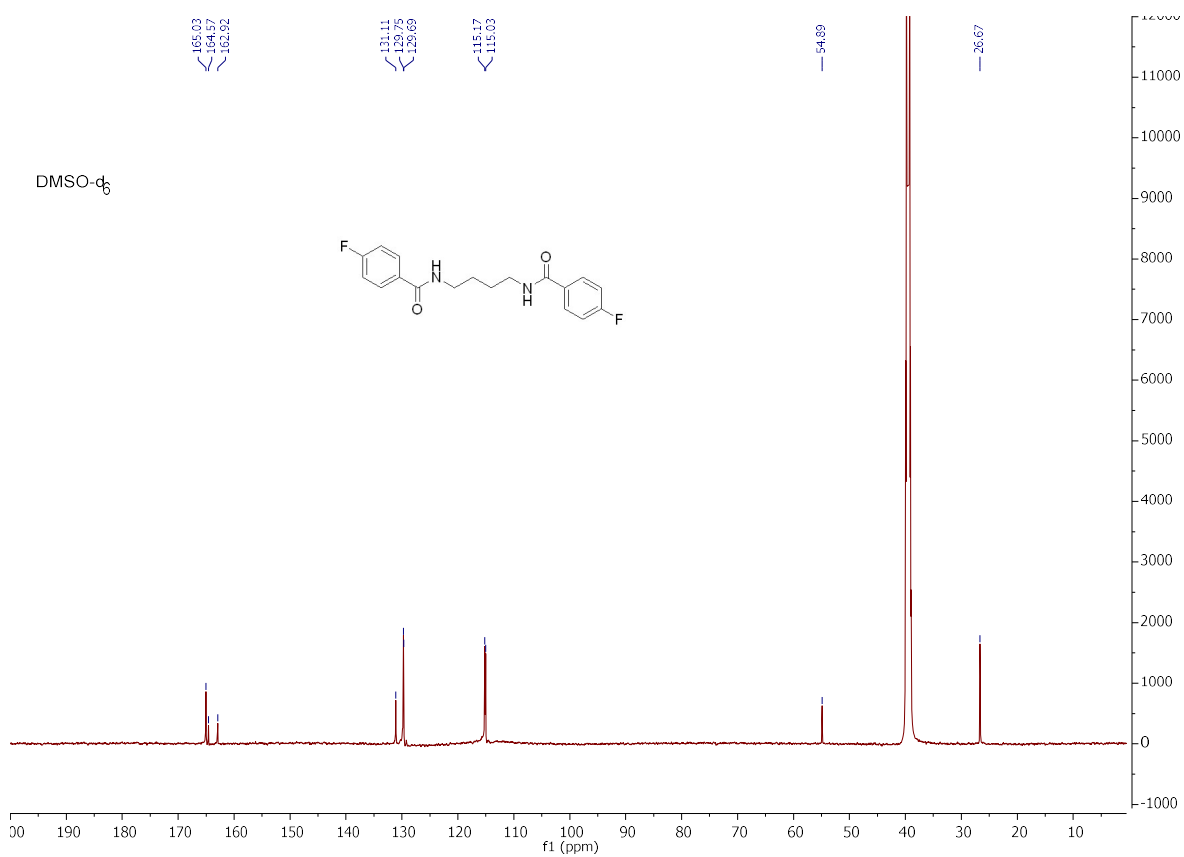

Supplementary Figure S31. <sup>13</sup>C-NMR 5d.

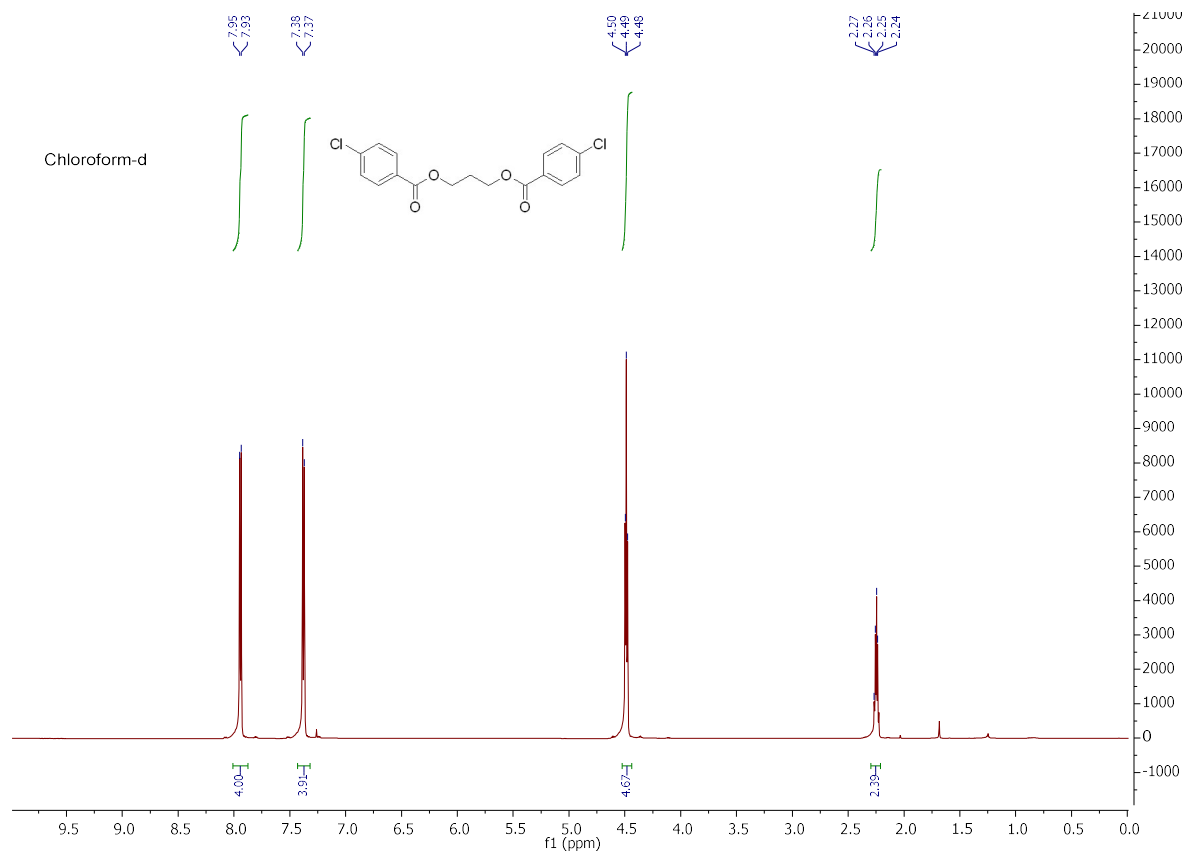

Supplementary Figure S32.  $^1\text{H}$ -NMR 6a.

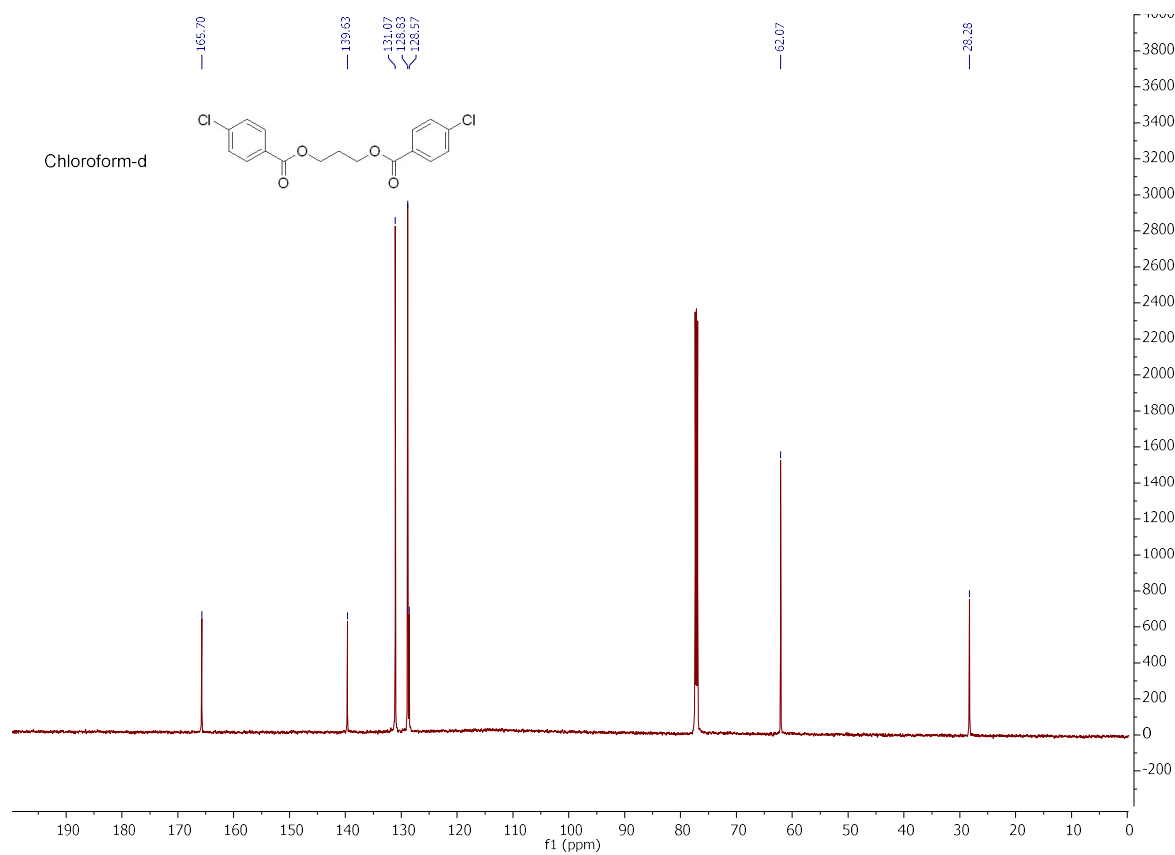

Supplementary Figure S33.  $^{13}\text{C}$ -NMR 6a.

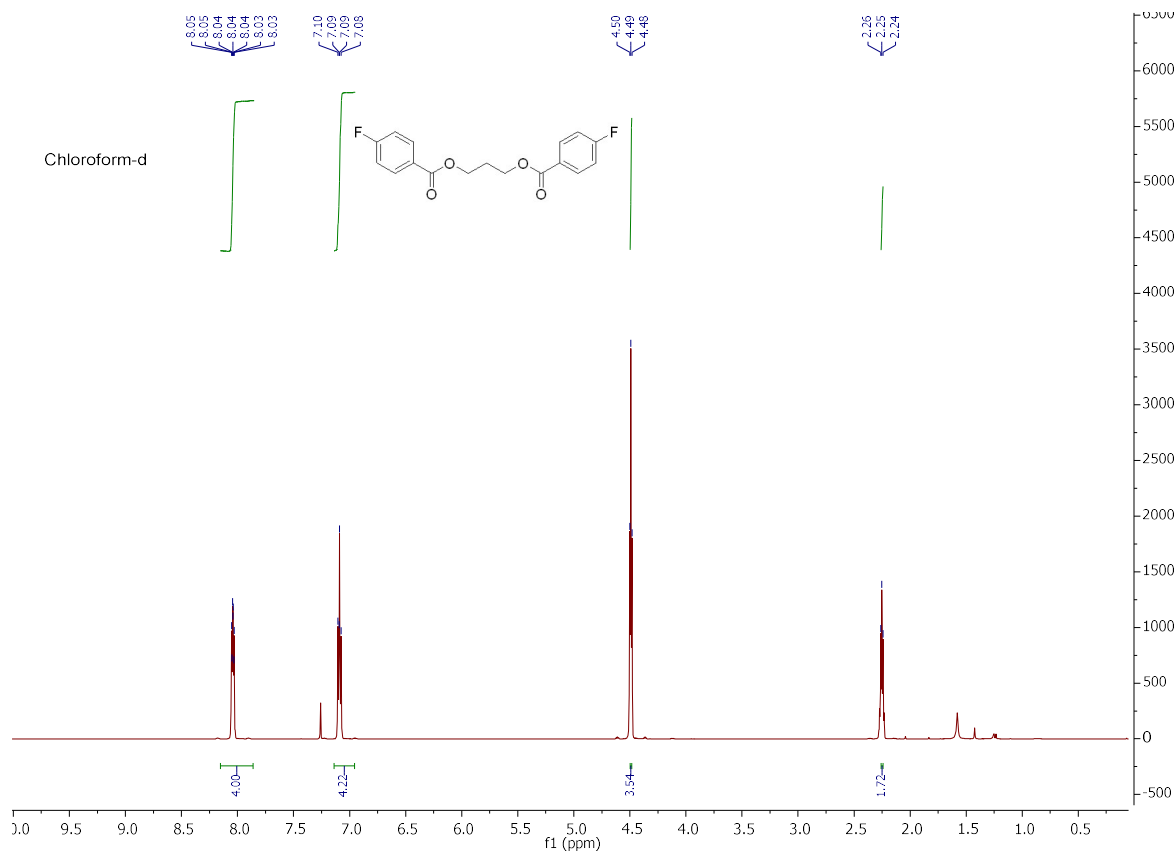

Supplementary Figure S34.  $^1\text{H}$ -NMR 6b.

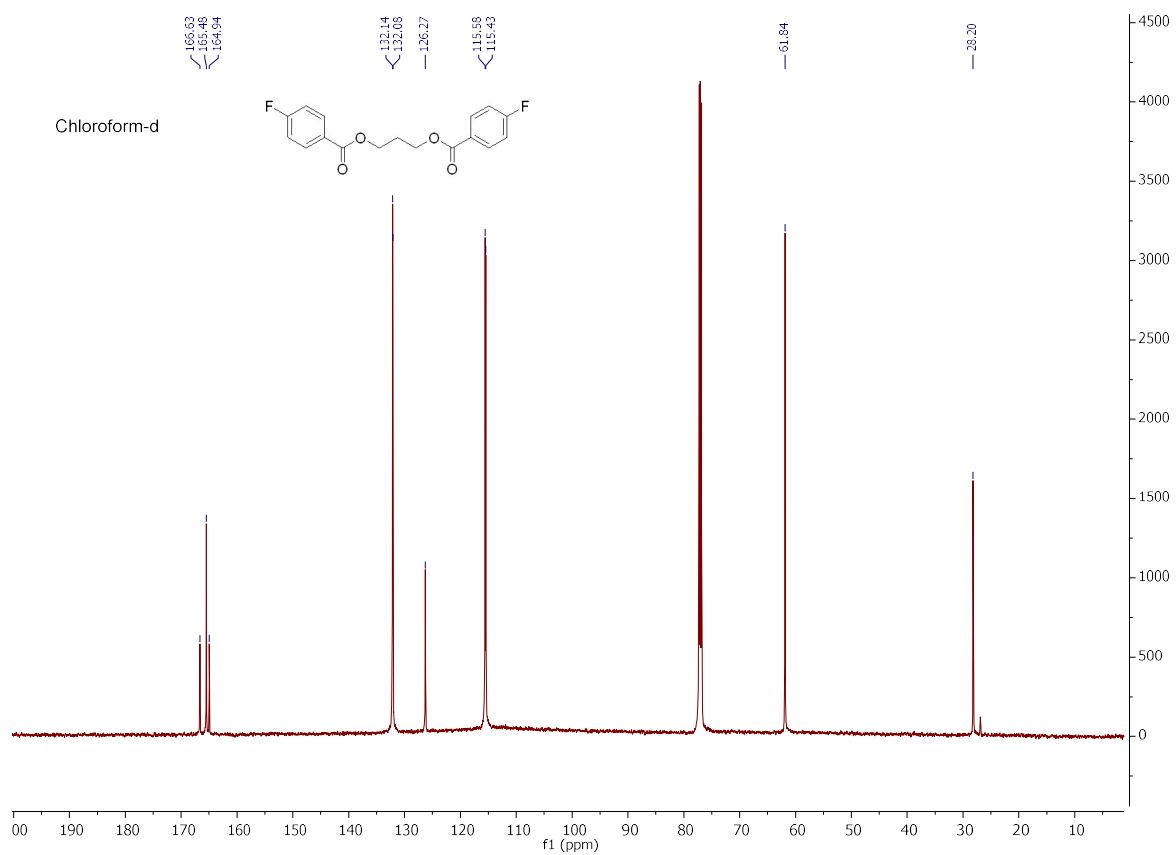

Supplementary Figure S35.  $^{13}\text{C}$ -NMR 6b.

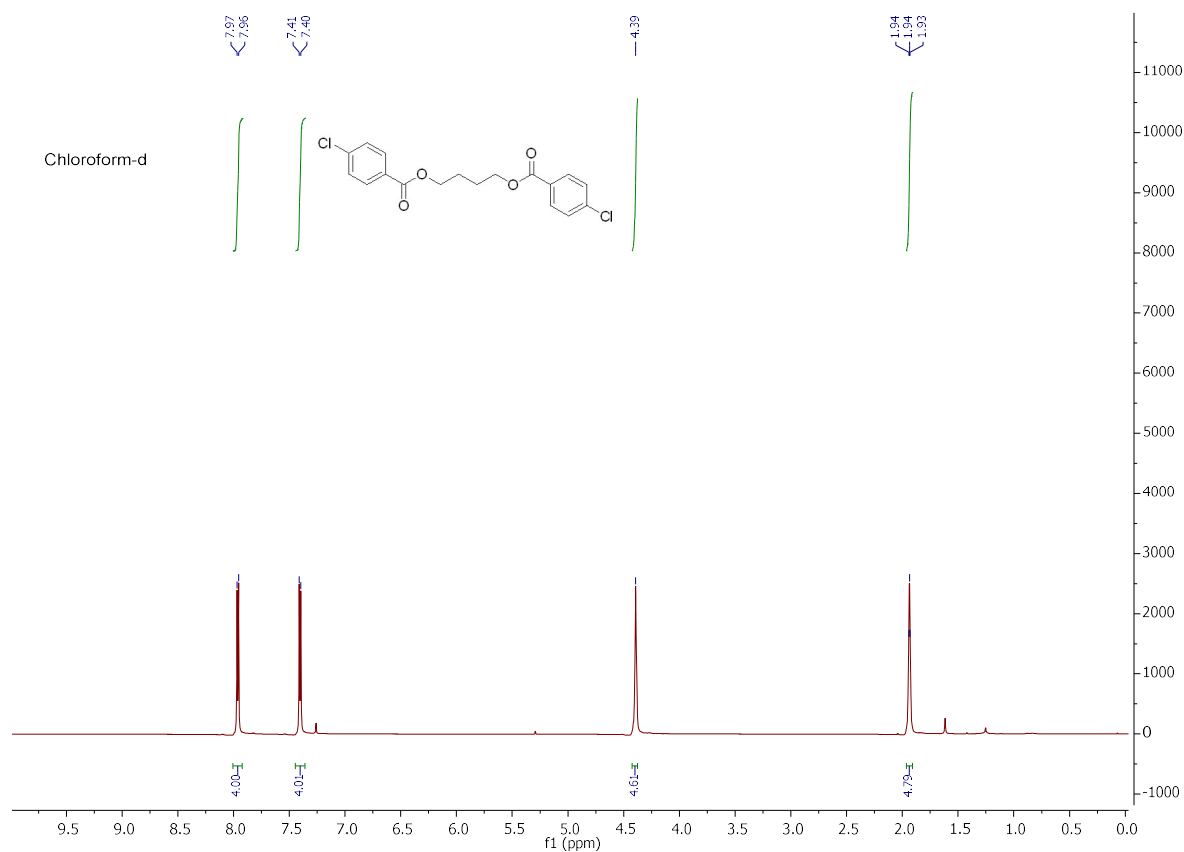

Supplementary Figure S36.  $^1\text{H}$ -NMR 6c.

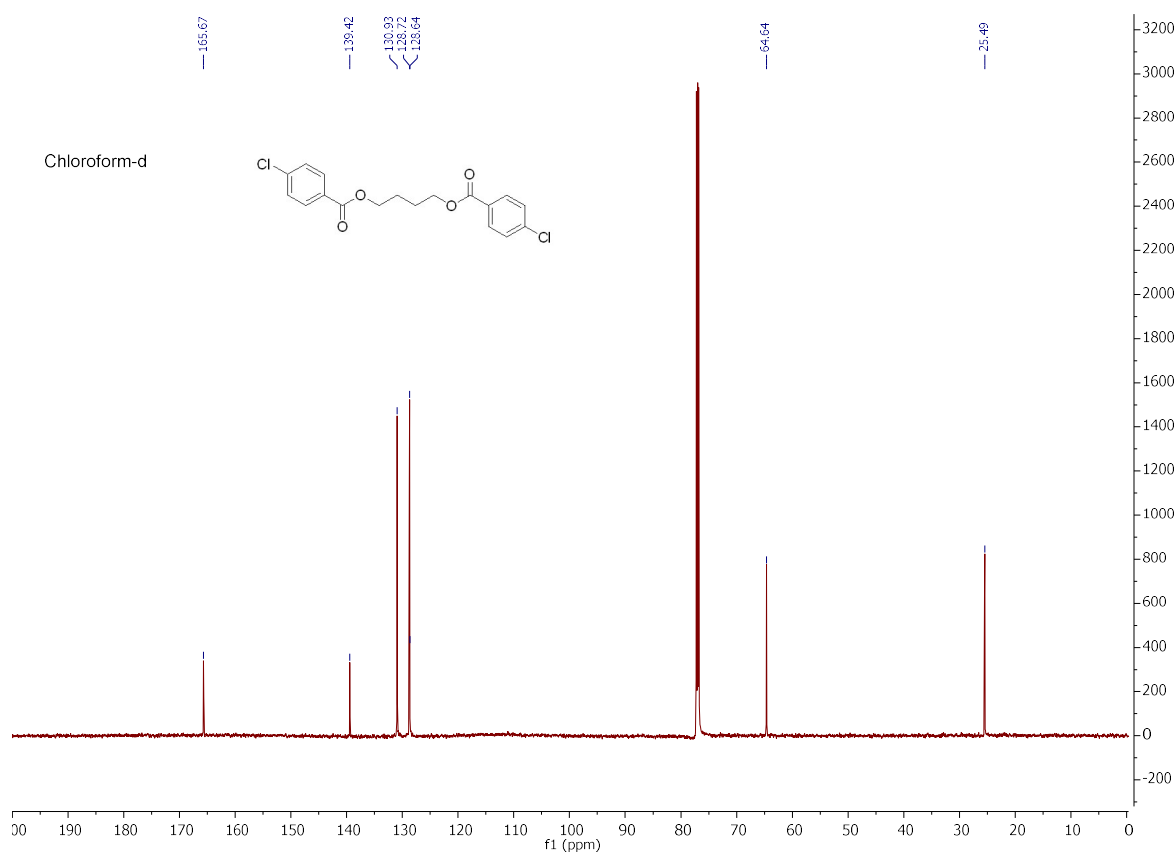

Supplementary Figure S37.  $^{13}\text{C}$ -NMR 6c.

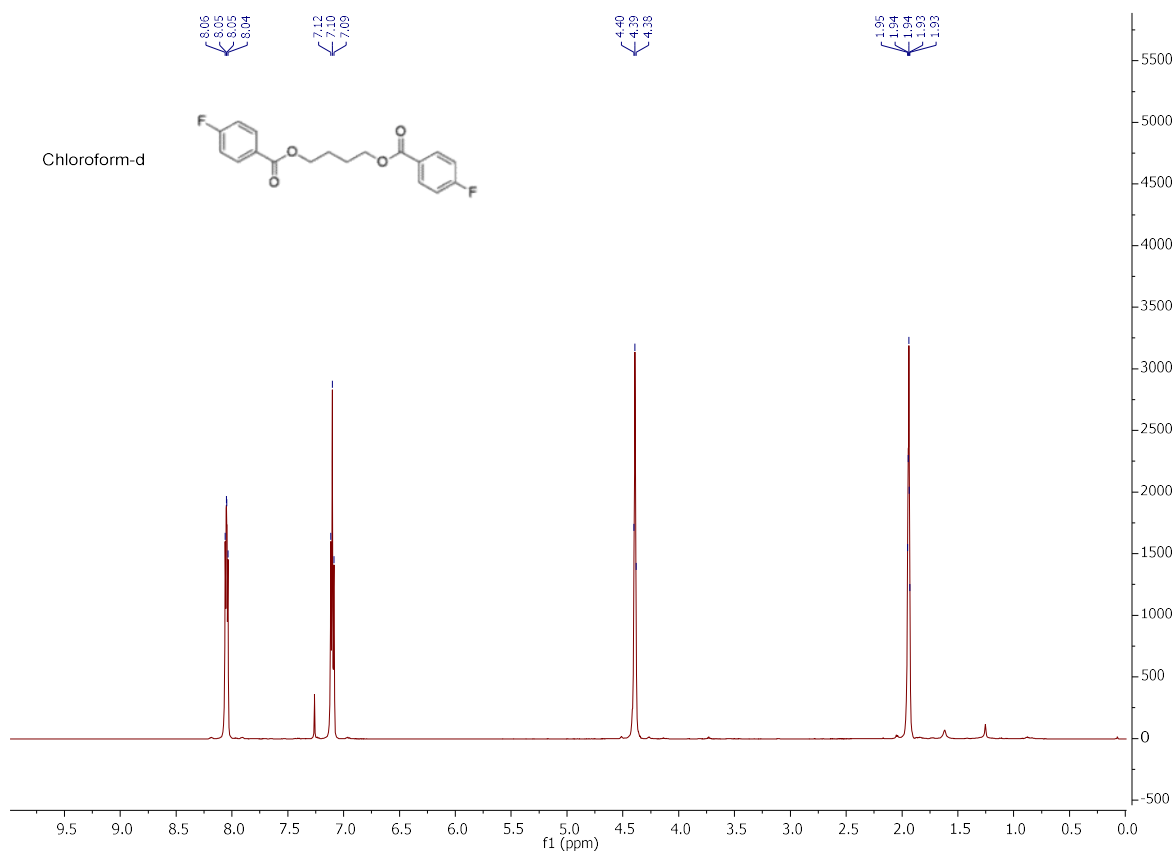

Supplementary Figure S38. <sup>1</sup>H-NMR 6d.

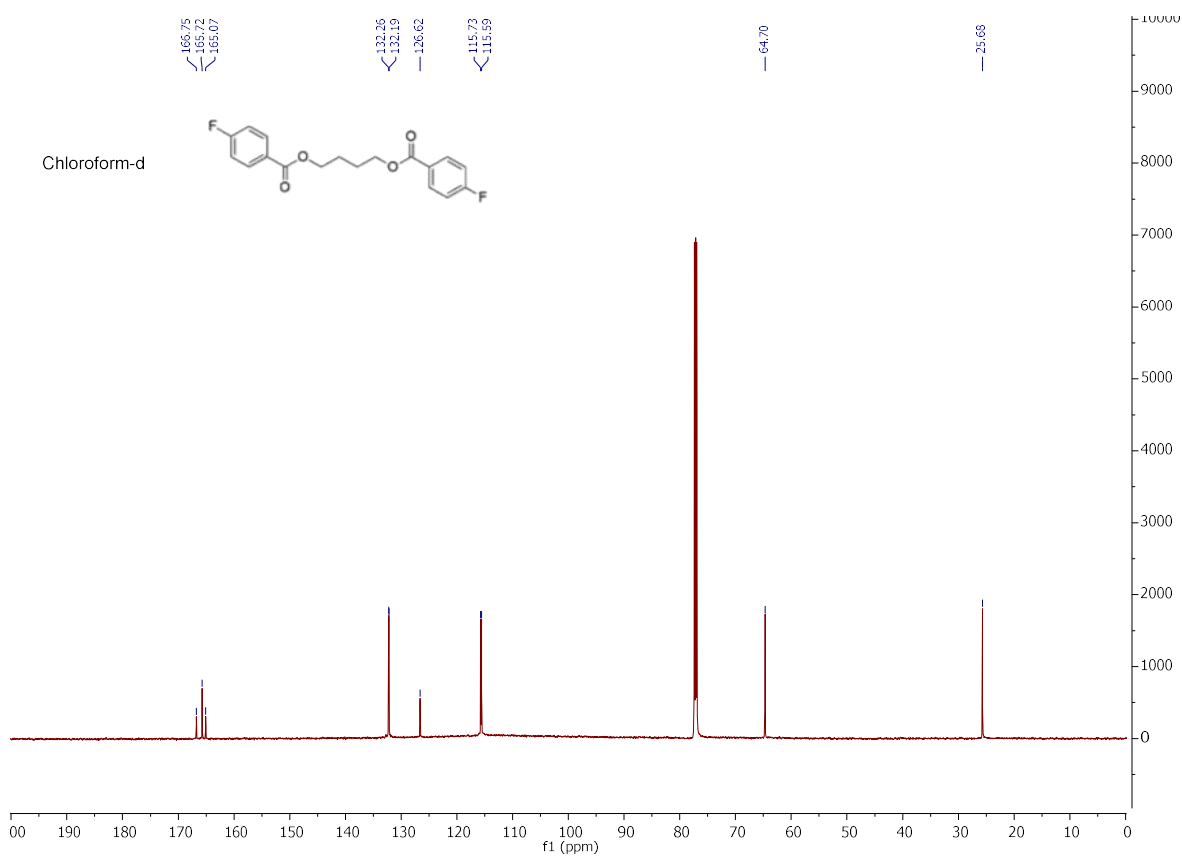

Supplementary Figure S39. <sup>13</sup>C-NMR 6d.

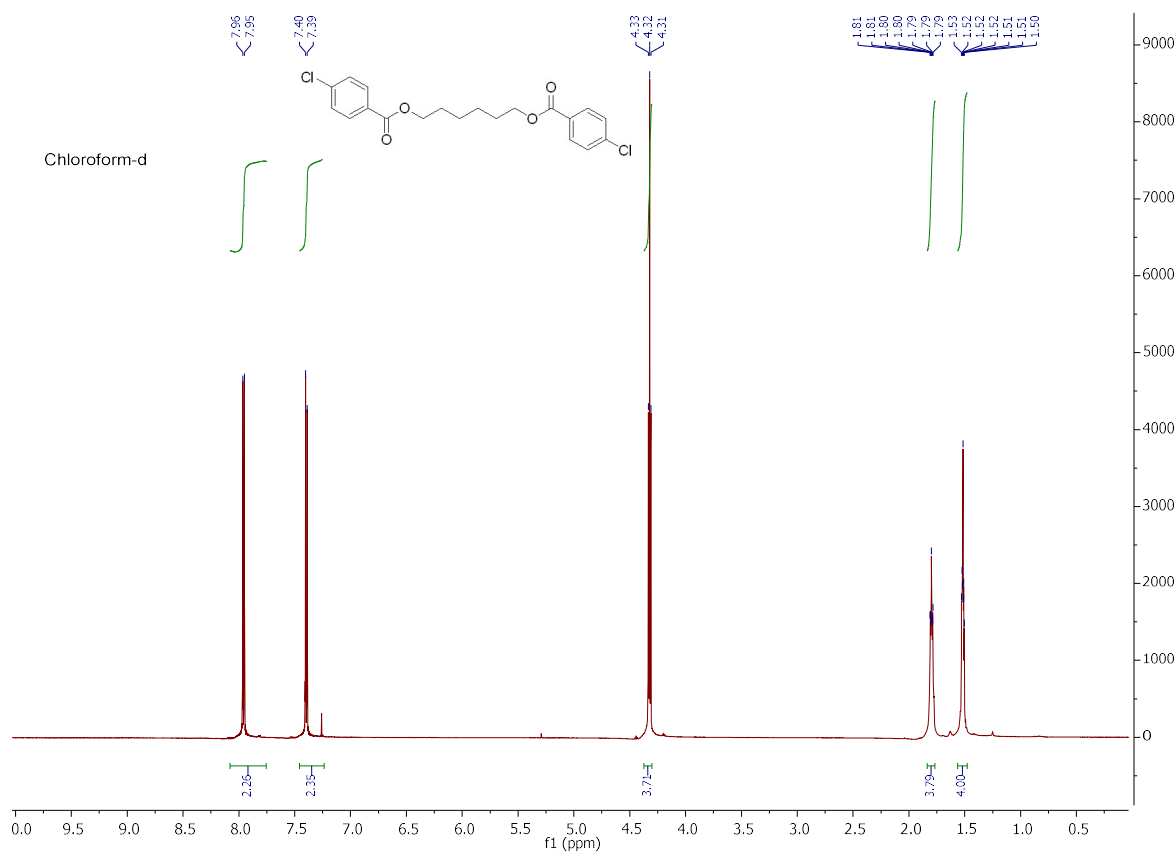

Supplementary Figure S40. <sup>1</sup>H-NMR 6e.

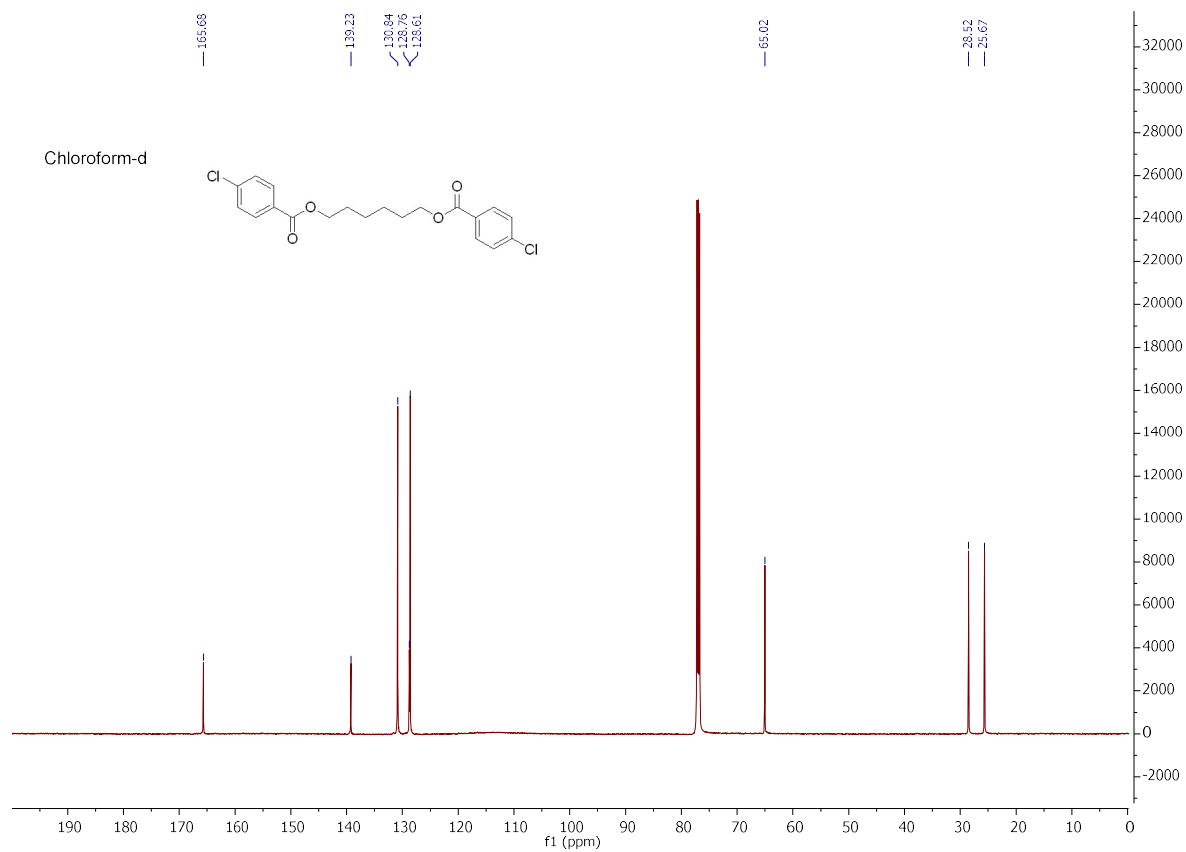

Supplementary Figure S41. <sup>13</sup>C-NMR 6e.



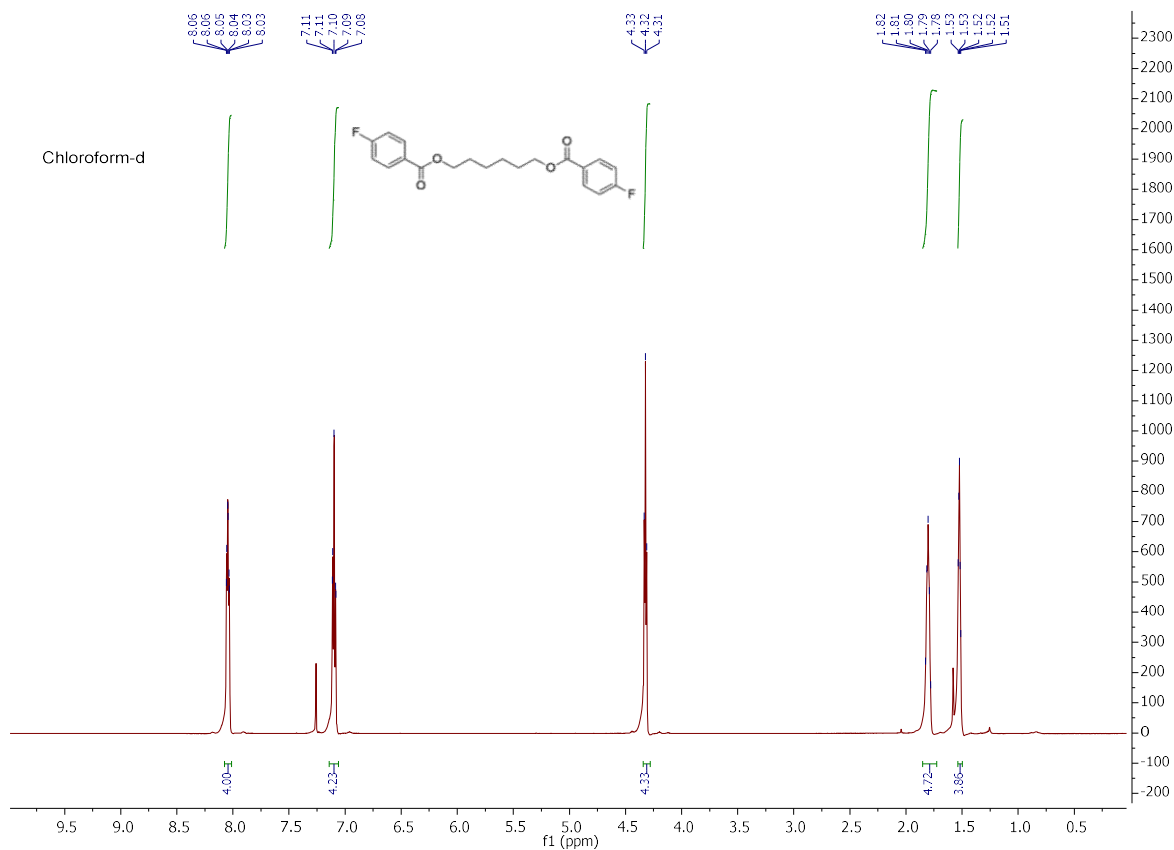

Supplementary Figure S42.  $^1\text{H}$ -NMR 6f.

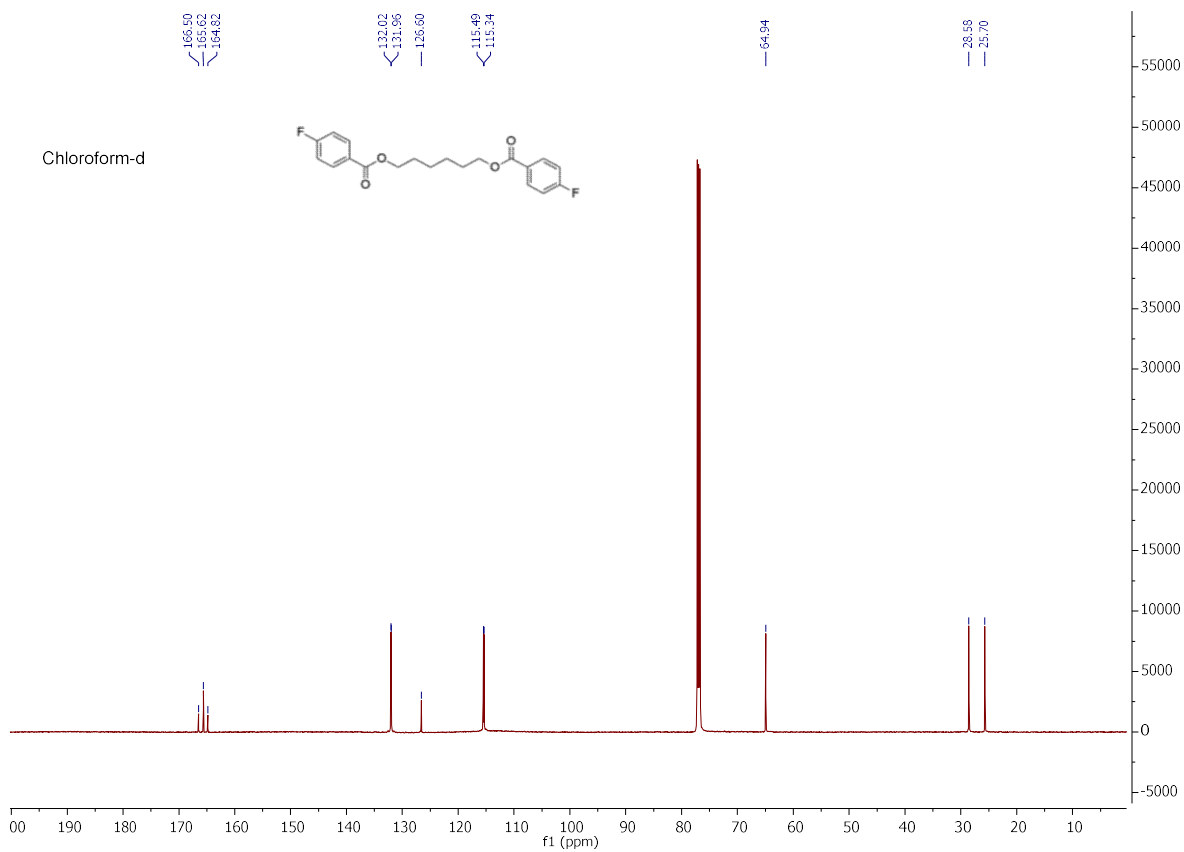

Supplementary Figure S43.  $^{13}\text{C}$ -NMR 6f.

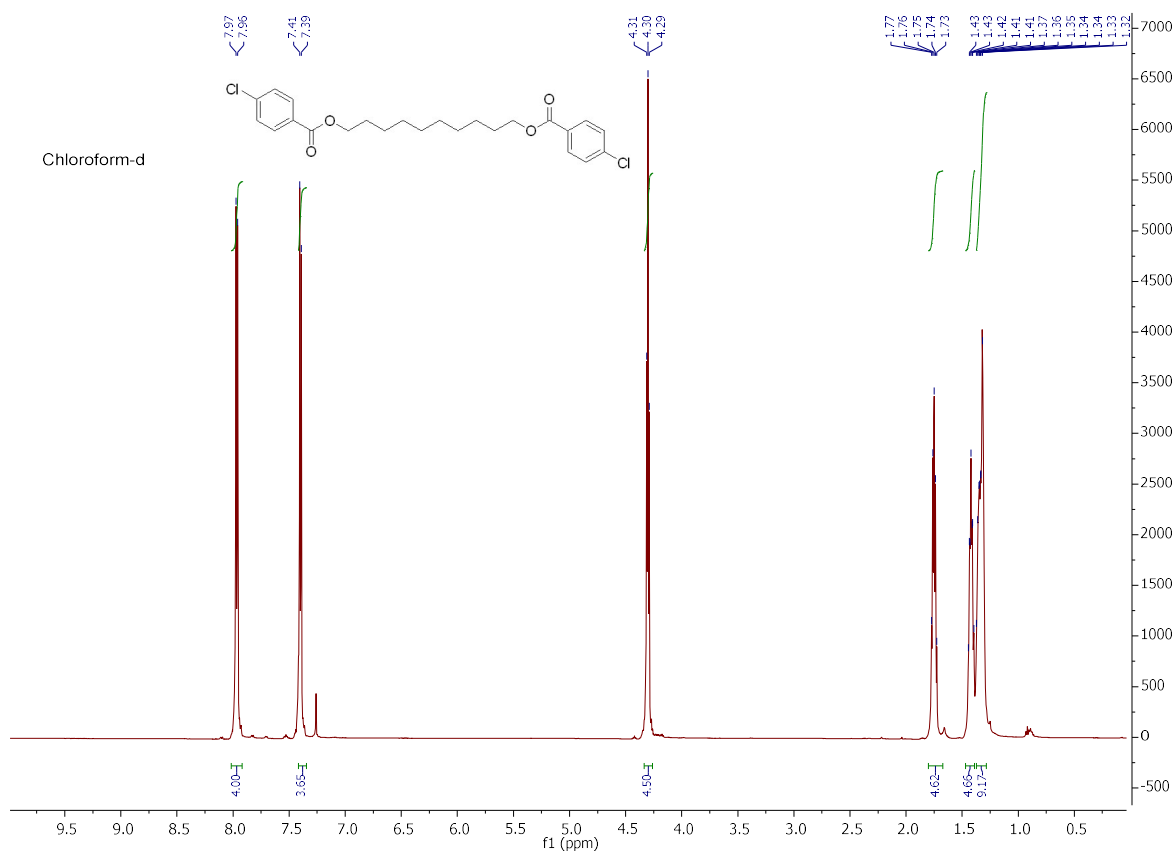

Supplementary Figure S44. <sup>1</sup>H-NMR 6g.

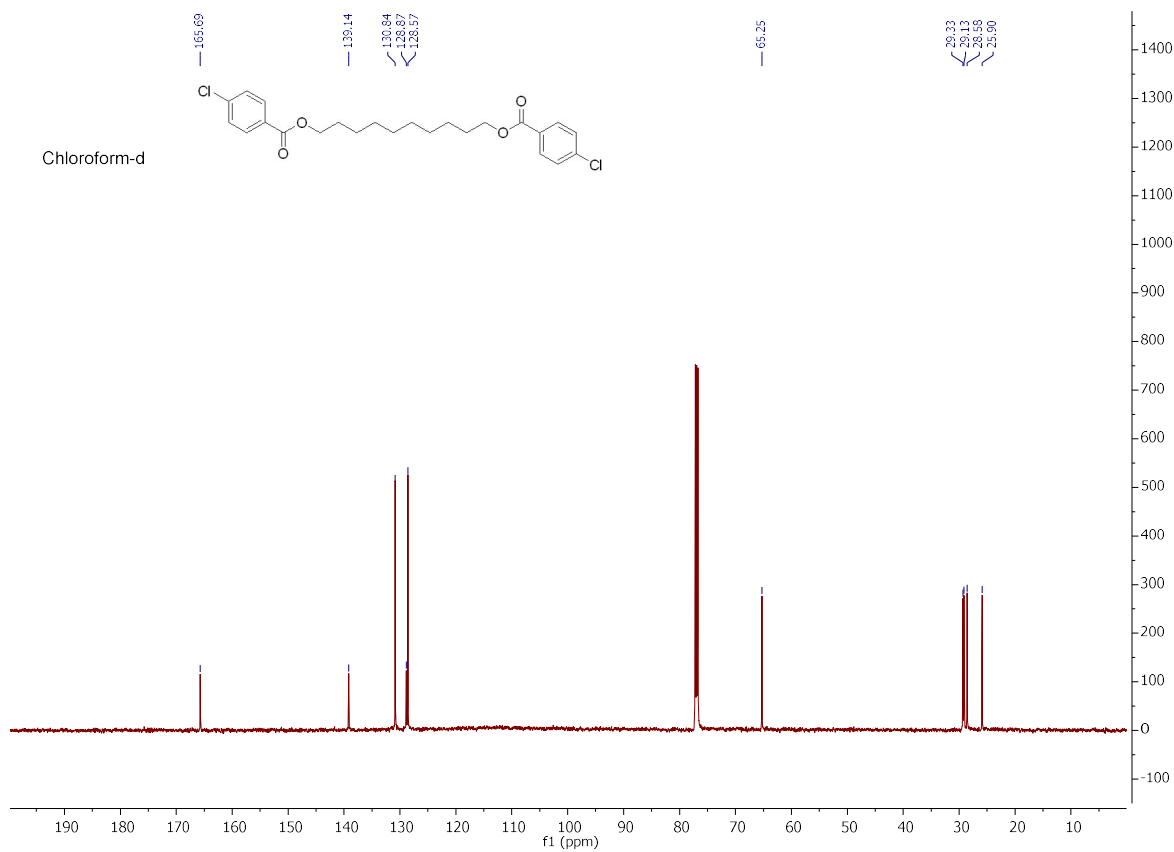

Supplementary Figure S45. <sup>13</sup>C-NMR 6g.

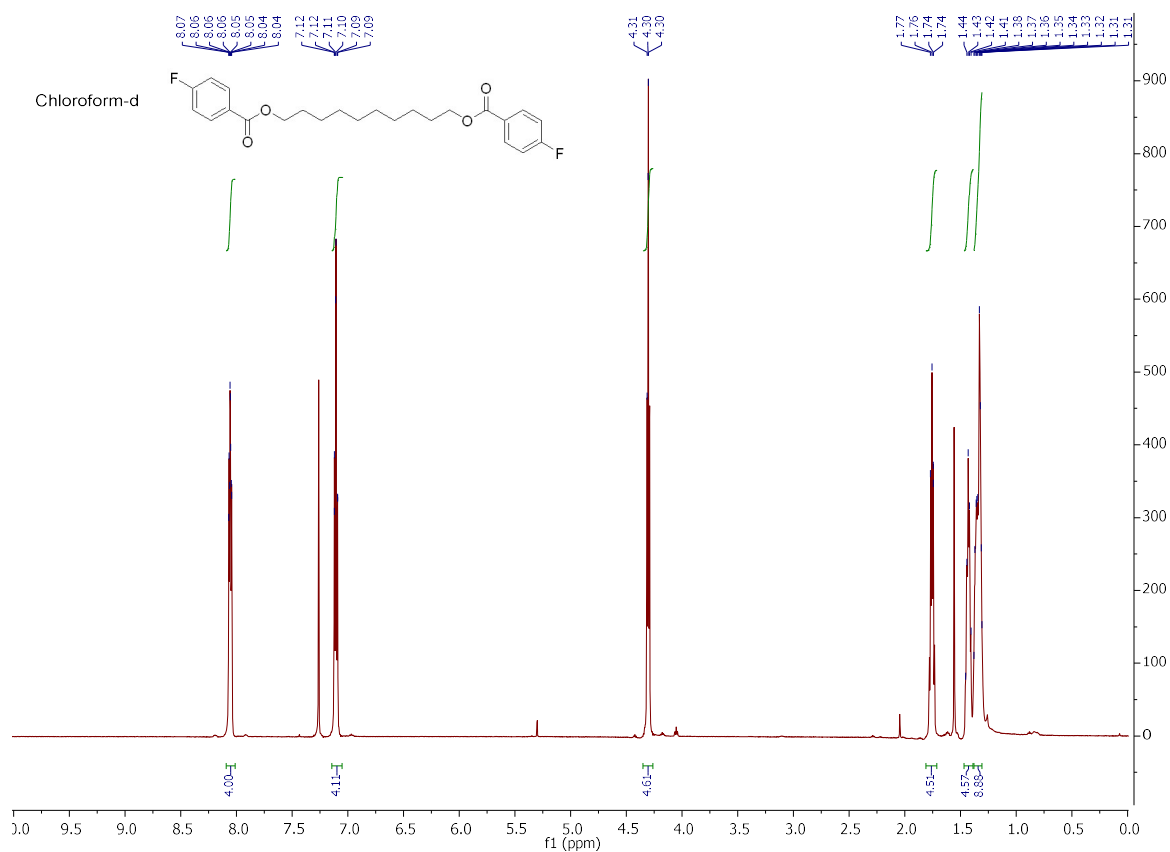

Supplementary Figure S46.  $^1\text{H}$ -NMR 6h.

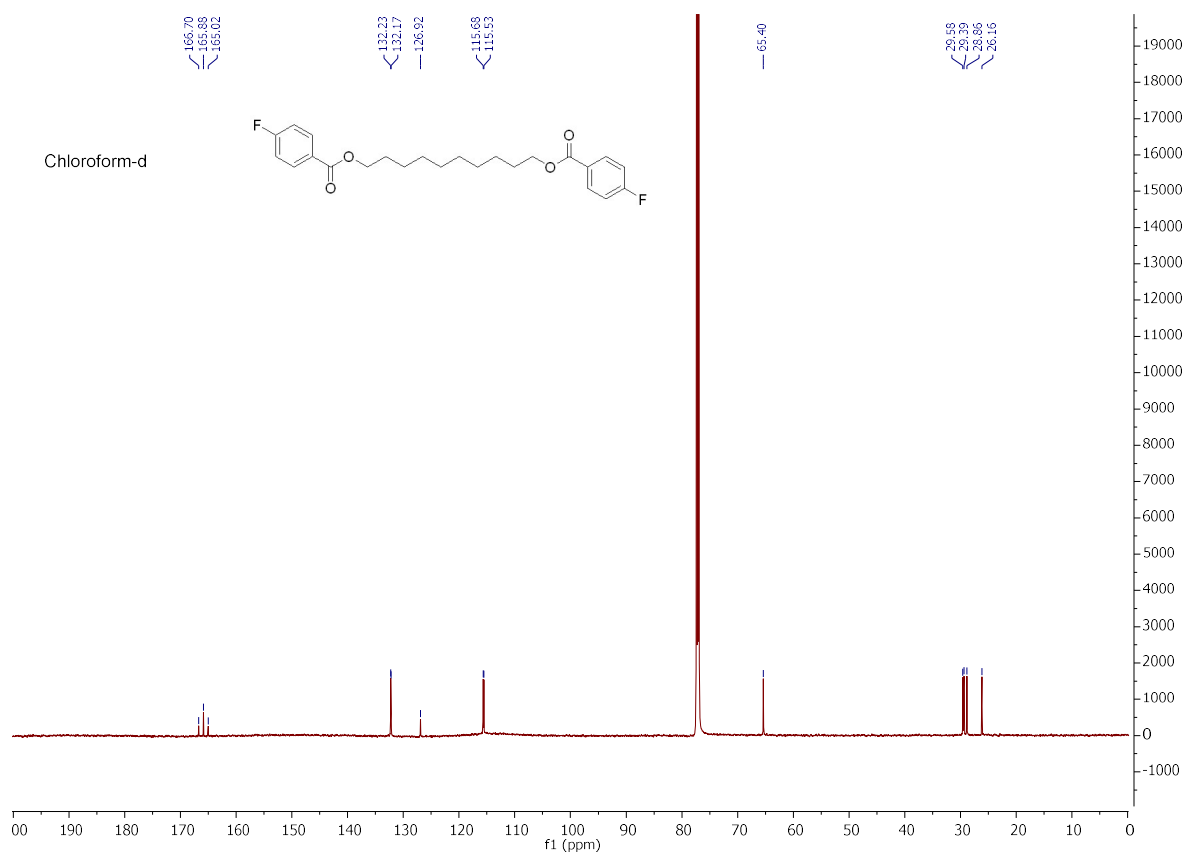

Supplementary Figure S47.  $^{13}\text{C}$ -NMR 6h.

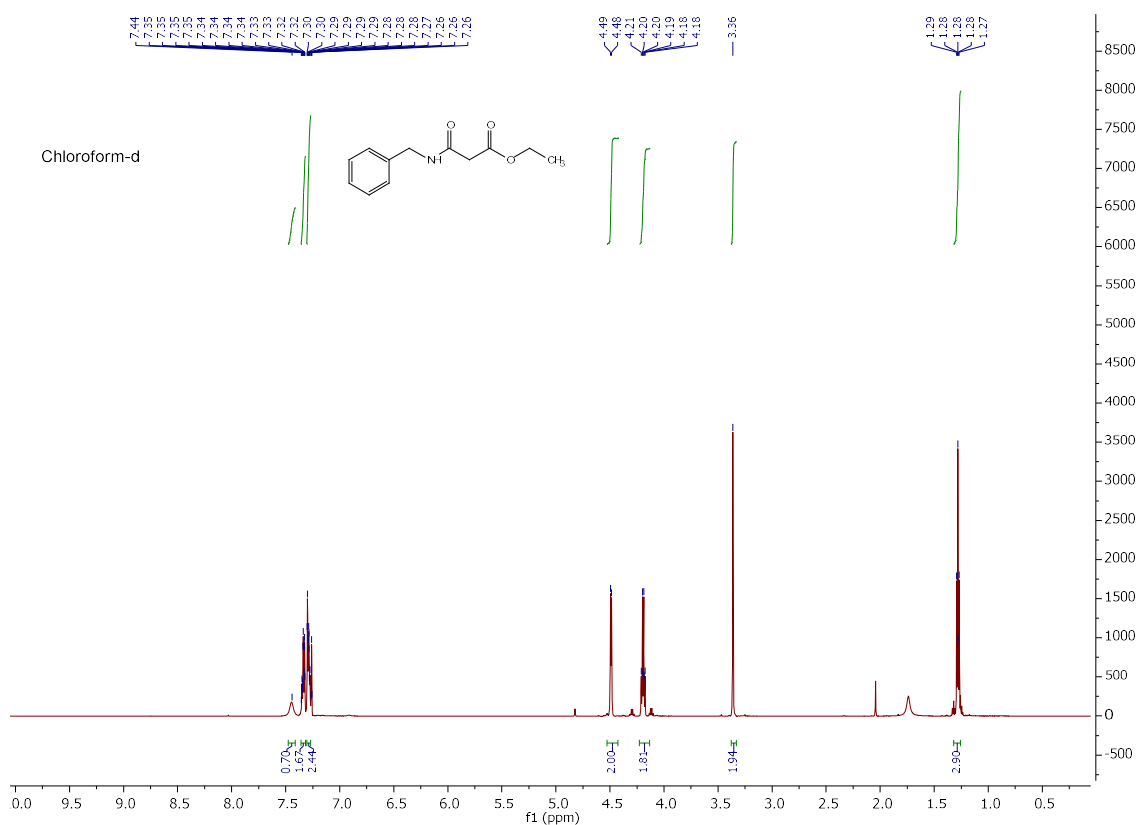

Supplementary Figure S48.  $^1\text{H}$ -NMR 9.

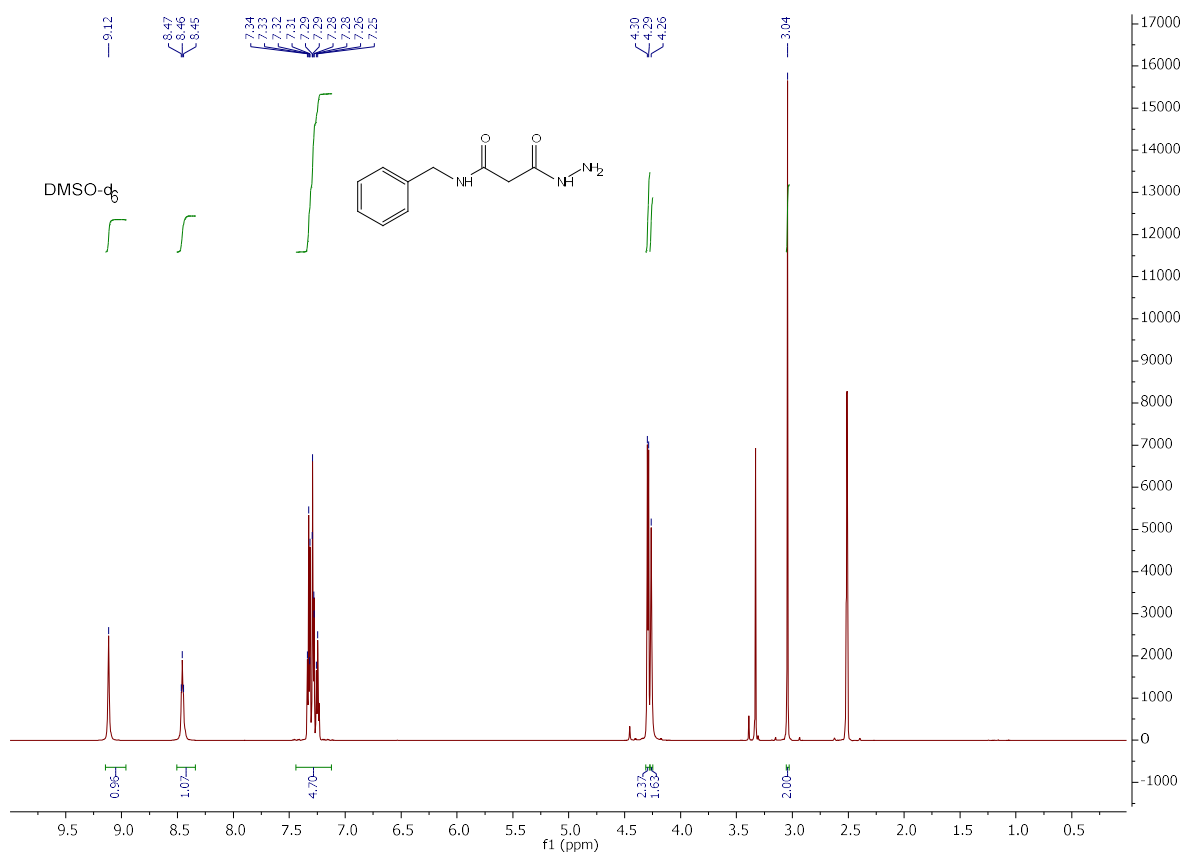

Supplementary Figure S49.  $^1\text{H}$ -NMR 10.

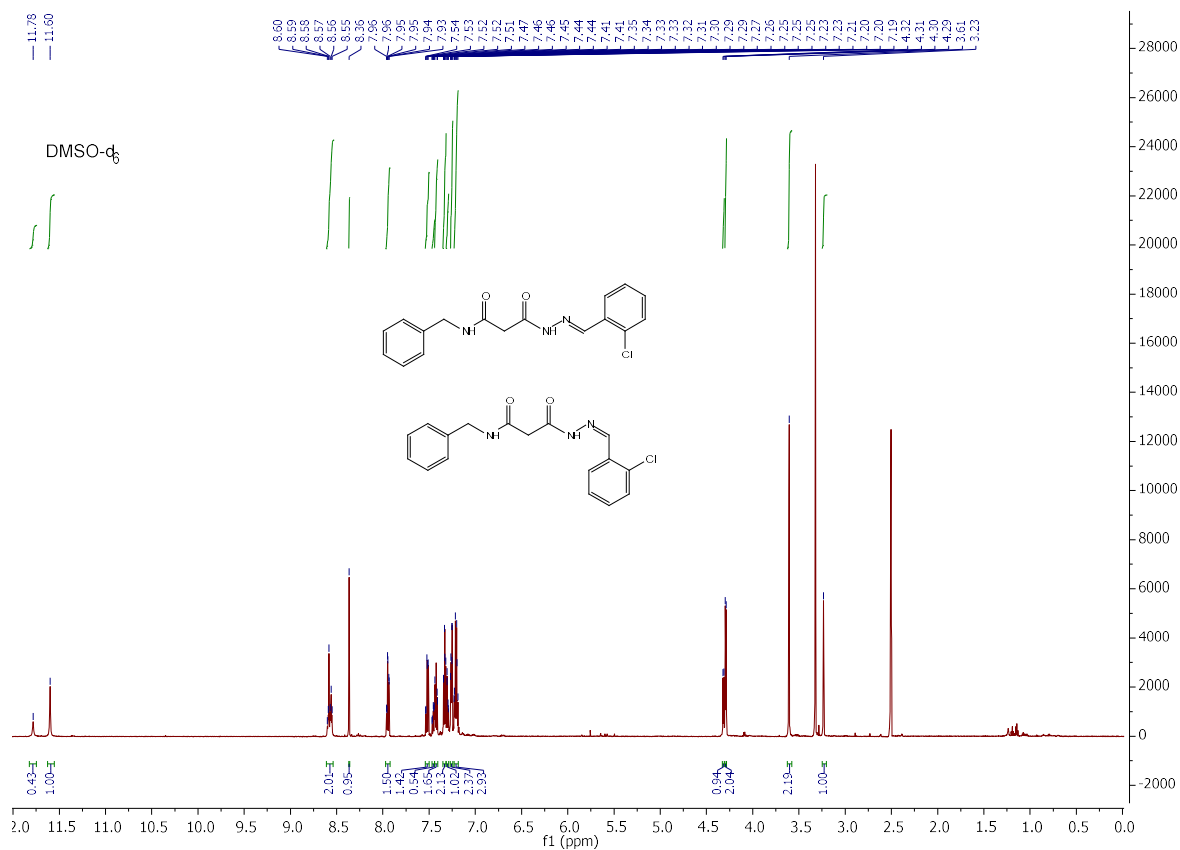

Supplement: s1 [file s1]
